1           **Thymic macrophages consist of two populations with distinct**  
2                                   **localization and origin**

3

4 Tyng-An Zhou<sup>1</sup>, Hsuan-Po Hsu<sup>1</sup>, Yueh-Hua Tu<sup>2,3</sup>, Chih-Yu Lin<sup>1</sup>, Nien-Jung  
5 Chen<sup>1</sup>, Jin-Wu Tsai<sup>4</sup>, Ellen A. Robey<sup>5</sup>, Hsuan-Cheng Huang<sup>2,6</sup>, Chia-Lin Hsu<sup>1</sup>,  
6 and Ivan L. Dzhagalov<sup>1\*</sup>

7 <sup>1</sup>Institute of Microbiology and Immunology, National Yang-Ming University, Taipei, Taiwan

8 <sup>2</sup>Bioinformatics Program, Taiwan International Graduate Program, Institute of Information  
9 Science, Academia Sinica, Taipei, Taiwan

10 <sup>3</sup>Graduate Institute of Biomedical Electronics and Bioinformatics, National Taiwan University,  
11 Taipei, Taiwan

12 <sup>4</sup>Brain Research Center, National Yang-Ming University, Taipei, Taiwan

13 <sup>5</sup>Division of Immunology and Pathogenesis, Department of Molecular and Cell Biology,  
14 University of California, Berkeley, CA, United States

15 <sup>6</sup>Institute of Biomedical Informatics, National Yang-Ming University, Taipei, Taiwan

16

17 \*Correspondence to Ivan L. Dzhagalov: [ivan.dzhagalov@nycu.edu.tw](mailto:ivan.dzhagalov@nycu.edu.tw), ORCID: 0000-0001-  
18 9209-4582

19 Mailing Address: Ivan L. Dzhagalov, Institute of Microbiology and Immunology, National  
20 Yang-Ming Chiao-Tung University, #155, Sec. 2, LiNong Street, Beitou, Taipei City, 11221,  
21 TAIWAN

22

23

24        **Abstract**

25        Tissue-resident macrophages are essential for protection from pathogen  
26        invasion and maintenance of organ homeostasis. The ability of thymic  
27        macrophages to engulf apoptotic thymocytes is well appreciated, but little is  
28        known about their ontogeny, maintenance, and diversity. Here, we  
29        characterized the surface phenotype and transcriptional profile of these cells  
30        and found out that they express typical tissue-resident macrophage genes yet  
31        also exhibit organ-specific features. Thymic macrophages were most closely  
32        related to spleen red pulp macrophages and Kupffer cells and shared the  
33        expression of the transcription factor SpiC with these cells. Using shield  
34        chimeras, transplantation of embryonic thymuses, and fate mapping, we  
35        found that three distinct waves of precursors generate thymic macrophages.  
36        Moreover, some of them proliferated in situ. Single-cell RNA sequencing  
37        showed that the macrophages in the adult thymus are composed of two  
38        populations with distinct localization and origin. Altogether, our work defines  
39        the phenotype, origin, and diversity of thymic macrophages.

40

## 41        **Introduction**

42        Tissue-resident macrophages are present in every organ and maintain  
43        local homeostasis through diverse functions ranging from protection against  
44        pathogens to tissue repair[1]. To perform their roles efficiently, macrophages  
45        acquire specialized phenotypes depending on the tissue microenvironment,  
46        and as a consequence, multiple subtypes exist, frequently within the same  
47        organ. For example, the spleen harbors red pulp macrophages specialized in  
48        red blood cell phagocytosis, marginal zone macrophages and metallophilic  
49        macrophages that are the first defense against blood-borne pathogens, T cell  
50        zone macrophages that silently dispose of apoptotic immune cells, and  
51        tingible-body macrophages that engulf less fit B cells in the germinal center[2-  
52        4]. Thus, tissue-resident macrophages represent a fascinating developmental  
53        system that allows enormous plasticity.

54        The last decade has seen a paradigm shift in our understanding of the  
55        development of tissue-resident macrophages. Contrary to the long-held belief  
56        that all macrophages derive from circulating monocytes[5], multiple studies  
57        have shown that many of them are long-lived cells with an embryonic origin  
58        that can maintain themselves in the tissues (reviewed in[6]). Three waves of  
59        distinct progenitors settle the tissues and contribute in various degrees to the  
60        resident macrophages in each organ. The first wave consists of yolk sac (YS)-  
61        derived primitive macrophages that enter all tissues and establish the earliest  
62        macrophage populations[7,8]. In all organs, except for the brain and, partially,  
63        the epidermis, primitive macrophages are replaced by the next wave  
64        consisting of fetal monocytes[9-12]. The third wave comes from hematopoietic  
65        stem cell (HSC)-derived monocytes that contribute to various degrees to the

66 macrophage pool in different tissues. For example, these cells contribute little  
67 to the microglia in the brain, Langerhans cells in the epidermis, and alveolar  
68 macrophages in the lungs but substantially to most other organs[13-16].  
69 Moreover, the kinetics and timing of HSC-derived monocytes infiltration vary  
70 in different parts of the body. For some macrophage populations, such as the  
71 arterial macrophages and subcapsular lymph node macrophages, monocytes  
72 replace embryonic macrophages soon after birth and self-maintain after that  
73 with little contribution from circulating cells[17,18]. Others, such as heart  
74 macrophages, osteoclasts, and pancreatic isles macrophages are  
75 progressively replaced at a low rate[14,19-23]. A third group, such as the  
76 macrophages in the dermis and most of the gut macrophages, are constantly  
77 replaced by blood monocytes with relatively fast kinetics[24,25]. These  
78 conclusions have been extended to many different macrophage populations  
79 such as Kupffer cells, liver capsular macrophages, red pulp macrophages,  
80 testicular macrophages, large and small peritoneal macrophages, and T zone  
81 macrophages in the lymph nodes[2,13,14,16,26-30].

82 The recent revitalization in macrophage research has yet to reach thymic  
83 macrophages. Although their prodigious phagocytic ability is well  
84 appreciated[31], little is known about the origin, diversity, and maintenance of  
85 these cells. This gap in our knowledge is, in part, due to the lack of a  
86 consensus about the surface phenotype of thymic macrophages. Various  
87 groups have used different markers to identify these cells, such as F4/80 and  
88 Mac-3 (LAMP-2)[31], or CD4 and CD11b[32], or Mac-2 (galectin 3), F4/80 and  
89 ED-1 (CD68)[33]. Most commonly, researchers employ F4/80 and CD11b[34-  
90 37]. However, none of these markers is macrophage-specific: F4/80 is also

91 expressed on eosinophils and monocytes[38,39], while CD11b is present on  
92 most myeloid cells. The lack of a clear phenotypic definition of thymic  
93 macrophages has translated into the absence of models that target genes  
94 specifically in this population. For example, although macrophages in various  
95 organs have been successfully targeted with *Lyz2<sup>Cre</sup>*, *Csf1r<sup>Cre</sup>*, or *Cx3cr1<sup>Cre</sup>*,  
96 very few studies have used these models in the thymus[37,40,41].

97 Only a handful of studies has explored the origin of thymic macrophages.  
98 Several reports have indicated that these cells could be derived from T cell  
99 progenitors in the thymus based on an improved single cell in vitro culture and  
100 in vivo transplantation experiments[42,43]. However, these conclusions have  
101 been questioned based on fate-mapping experiments using *Il7r<sup>Cre</sup>* that found  
102 very limited contribution of lymphoid progenitors to thymic macrophages in  
103 vivo in unperturbed mice[44]. Most recently, Tacke et al. used parabiosis to  
104 rule out circulating monocytes as a major source for thymic macrophages[37].  
105 The same study also performed fate-mapping experiments to show that most  
106 thymic macrophages descend from *Flt3<sup>+</sup>* HSC-derived progenitors. However,  
107 the contribution of earlier waves of hematopoiesis has not been explored.

108 Here, we aimed to bring our knowledge of thymic macrophages on par with  
109 other tissue-resident macrophages. We started by providing a clear definition  
110 of thymic macrophages according to the guidelines set by the Immunological  
111 Genome Consortium (IMMGEN)[38] and characterized their surface  
112 phenotype and transcriptional signature. Using single-cell RNA sequencing  
113 (scRNA-Seq), we identified two populations of thymic macrophages with  
114 distinct localization. We explored the origin of these cells through genetic fate  
115 mapping, shield chimeras, and embryonic thymus transplantation and

116 documented that three separate waves of progenitors give rise to resident  
117 thymic macrophages. Altogether our work fills an important gap in our  
118 understanding of resident thymic macrophages and provides the framework  
119 for future functional characterization of these cells.

120

## 121 **Results:**

### 122 **CD64, F4/80, and MerTK identify the macrophages in the thymus**

123 To unambiguously and comprehensively identify macrophages in the  
124 thymus, we evaluated several of the prototypical macrophage markers,  
125 MerTK, CD64, and F4/80[38]. Only MerTK identified a population that stained  
126 completely with the other two markers (Fig. 1a). F4/80 labeled Siglec F<sup>+</sup>SSC<sup>hi</sup>  
127 eosinophils and CD64<sup>+</sup>CD11b<sup>+</sup> monocytes, in addition to MerTK<sup>+</sup> cells (Fig.  
128 S1a). CD64 identified CD11b<sup>+</sup>F4/80<sup>lo</sup> monocytes (Fig. S1b). Thus, MerTK  
129 appeared to be the best marker for macrophages in the thymus. However,  
130 staining with MerTK and F4/80 was relatively dim even when the brightest  
131 fluorochromes (e.g., PE) were used and could not be resolved fully from the  
132 isotype control (Fig. S1c). For practical purposes, to identify macrophages,  
133 we used CD64 together with F4/80 and CD11b to exclude monocytes (Fig.  
134 S1d). In addition, we also employed forward scatter (cells size) to exclude  
135 cells that appeared MerTK<sup>+</sup>, CD64<sup>+</sup>, F4/80<sup>+</sup>, but were much smaller and less  
136 granular than the rest of the macrophages, and many of them were Thy1<sup>+</sup>  
137 (Fig. S1e).

138 The CD64<sup>+</sup>F4/80<sup>+</sup>MerTK<sup>+</sup>CD11b<sup>lo</sup>FSC<sup>hi</sup> cells had typical macrophage  
139 morphology with abundant cytoplasm (Fig. 1b). These cells did not express  
140 lineage markers characteristic of T cells (CD3 $\epsilon$ ), B cells (CD19), eosinophils

141 (Siglec F), NK cells (NK1.1), neutrophils (Gr1), or plasmacytoid dendritic cells  
142 (Siglec H) (Fig. 1c). However, they expressed phagocytic receptors such as  
143 TIM4, CD51, and Axl (Fig. 1d).

144 To ascertain that our gating strategy identifies all macrophages in the  
145 thymus in an unbiased way, we performed scRNA-Seq of sorted *Csf1r*<sup>GFP+</sup>  
146 and *Cd11c*<sup>YFP+</sup> thymic cells. *Csf1r* is required for the survival of most  
147 macrophages and is considered their definitive marker[45,46], while *Cd11c*<sup>YFP</sup>  
148 is expressed in many myeloid cells, including macrophages[47]. Both  
149 reporters identified an overlapping set of cells (Fig. S2a). Two clusters  
150 expressed the macrophage/monocytes-specific transcription factor *Mafb* and  
151 high levels of *Fcrg1* (CD64), *Mertk*, and *Adgre1* (F4/80), indicating that they  
152 are macrophages (Fig. 1e). An additional cluster expressed *Mafb* together  
153 with *Fcgr1* and *Adgre1* but not *Mertk*, fitting the description of monocytes.  
154 Altogether the scRNA-Seq data confirmed that our flow cytometry gating had  
155 identified all macrophages in the thymus. Importantly, MerTK<sup>+</sup> cells could not  
156 be labeled by intravenously injected CD45 antibody (Fig. 1f), proving that they  
157 reside in the parenchyma of the organs and not in the blood vessels. Based  
158 on the above data, we will refer to CD64<sup>+</sup>F4/80<sup>+</sup>MerTK<sup>+</sup>CD11b<sup>lo</sup>FSC<sup>hi</sup> cells as  
159 thymic macrophages. The smaller CD64<sup>+</sup>F4/80<sup>lo</sup>CD11b<sup>+</sup>FSC<sup>hi</sup> population did  
160 not express MerTK, but most of them expressed Ly6C, and we classify them  
161 as thymic monocytes.

162 Thymic macrophages expressed CD11c, MHC2, and SIRP $\alpha$  that made  
163 them partially overlap with CD11c<sup>+</sup>MHC2<sup>+</sup> classical dendritic cells (cDCs),  
164 thus making problematic the unambiguous identification of thymic cDCs  
165 based only on these two markers (Fig. S1f). Proper identification of cDC in the

166 thymus requires the exclusion of macrophages based on CD64 or MerTK  
167 staining. Otherwise, the cDCs, particularly the SIRP $\alpha$ <sup>+</sup> cDC2 subset, would  
168 be contaminated with macrophages that account for ~25% of cDC2 (Fig.  
169 S1g).

170 Thymic macrophages were ~0.1% of all the cells in the thymus of young  
171 adult mice and numbered ~4x10<sup>5</sup> on average per mouse (Fig. 1g). We did not  
172 find statistically significant differences in their percentages between 4 and 11  
173 weeks of age. Still, there was a significant decline in their numbers with age,  
174 consistent with the beginning of thymic involution (Fig. 1h).

175 To determine if thymic macrophages are avid phagocytes, we evaluated  
176 their participation in the phagocytosis of apoptotic cells in the thymus by  
177 TUNEL staining. We used TIM4 and MerTK as single stains to identify  
178 macrophages in tissue sections because they are not expressed on any other  
179 cell type in the thymus instead of following our multiple-label flow cytometry  
180 strategy. Most of the TUNEL<sup>+</sup> cells could be found clearly inside or closely  
181 associated with MerTK<sup>+</sup> and TIM4<sup>+</sup> cells in the thymus (Fig. S3a and b). On  
182 average, ~85% of all TUNEL<sup>+</sup> cells were within 5  $\mu$ m of MerTK<sup>+</sup> cells,  
183 indicating that thymic macrophages are the major phagocytic population in the  
184 thymus (Fig. S3c). The degree of co-localization between TUNEL<sup>+</sup> cells and  
185 TIM4<sup>+</sup> cells was slightly lower, ~75% on average, possibly reflecting the  
186 absence of TIM4 expression on a small proportion of thymic macrophages  
187 (Fig. 1d).

188

189



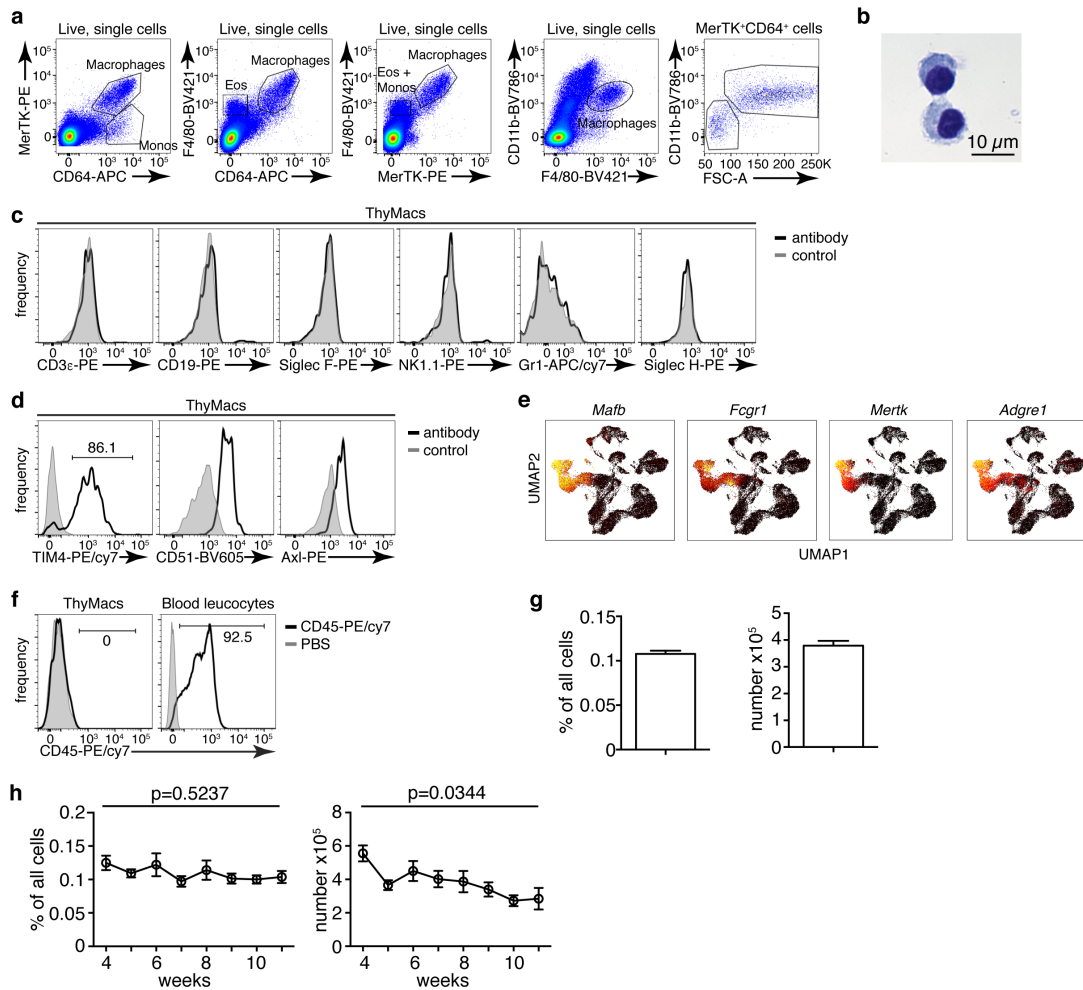

190 **Figure 1. Thymic macrophages (ThyMacs) can be identified by the**  
 191 **expression of CD64, MerTK and F4/80. a** Flow cytometric analysis of  
 192 enzymatically digested thymus tissue with macrophage markers CD64,  
 193 MerTK, F4/80, and CD11b. More details about the confirmation of the  
 194 identities of eosinophils and monocytes can be found in Fig. S1a and b. **b**  
 195 Pappenheim (Hemacolor Rapid staining kit) staining of sorted ThyMacs. **c**  
 196 Lack of expression of lineage markers associated with other cell types on  
 197 ThyMacs. **d** The expression on ThyMacs of three receptors for  
 198 phosphatidylserine that participate in the phagocytosis of apoptotic cells. **e**  
 199 scRNA-Seq data showing the expression of prototypical macrophage genes  
 200 *Mafb*, *Fcgr1* (CD64), *Mertk*, and *Adgre1* (F4/80) among thymus cells sorted  
 201 as *Csf1r*<sup>GFP+</sup> and *Cd11c*<sup>YFP+</sup>. **f** Labeling of ThyMacs with intravenously

202 injected anti-CD45-PE antibody or PBS. The labeling of blood leucocytes is  
203 shown for comparison. **g** Average numbers and percentages of ThyMacs in 4-  
204 11 weeks old mice, n=82. **h** Comparison of the numbers and percentages of  
205 ThyMacs in mice of different ages, n=82. All flow cytometry plots are  
206 representative of at least 3 independent repeats. The numbers in the flow  
207 cytometry plots are the percent of cells in the respective gates. Data in **g** and  
208 **h** represent mean±SEM. Statistical significance in **h** was determined with one-  
209 way ANOVA.

210

### 211 **Transcriptional signature of thymic macrophages**

212 To further understand the identity and functions of the thymic  
213 macrophages, we sorted and subjected them to RNA sequencing analysis as  
214 part of the IMMGEN's Open Source Mononuclear Phagocyte profiling.  
215 Thymic macrophages displayed a transcription profile consistent with tissue-  
216 resident macrophages and did not express genes characteristic of other  
217 lineages (Fig. 2a). Then, we examined the expression of the core signature  
218 macrophage genes[38] and found that they were enriched in thymic  
219 macrophages but not in *Sirpa*<sup>+</sup> or *Xcr1*<sup>+</sup> thymic cDCs (Fig. 2b). On the  
220 contrary, cDC core signature genes were abundantly expressed in both  
221 thymic cDC subsets but not in thymic macrophages. These findings establish  
222 that although thymic macrophages and cDCs share the thymic  
223 microenvironment and expression of CD11c and MHC2, they have distinct  
224 transcriptional profiles.

225 We then compared the gene expression profile of thymic macrophages to  
226 that of other well-characterized macrophage populations available from

227 IMMGEN. Because of the abundance of samples, we limited our comparison  
228 to only nine types of tissue-resident macrophages under steady-state  
229 conditions – splenic red pulp macrophages, Kupffer cells, broncho-alveolar  
230 lavage macrophages, large peritoneal cavity macrophages, white adipose  
231 tissue macrophages, aorta macrophages, central nervous system microglia,  
232 and spinal cord microglia. Hierarchical clustering revealed that thymic  
233 macrophages were most closely related to splenic red pulp macrophages and  
234 Kupffer cells (Fig. 2c).

235 To better identify the unique functions of thymic macrophages, we looked  
236 for genes that were differentially expressed in these cells compared to other  
237 tissue-resident macrophages. We set three criteria: 1) high expression in  
238 thymic macrophages (>500); 2) >5 fold higher expression than the average  
239 value in the nine populations of non-thymic macrophages; 3) expression in  
240 thymic macrophages is higher than any non-thymic macrophage samples. A  
241 total of 44 genes met these criteria, and we consider them to constitute the  
242 transcriptional signature of thymic macrophages (Fig. 2d). These included  
243 several degradation enzymes and their inhibitors (*Cst7*, *Mmp2*, *Mmp14*,  
244 *Dnase1l3*, *Serpina3g*, *Acp5*), non-classical MHC molecules (*H2-M2*, *H2-Q6*,  
245 *H2-Q7*), metabolic enzymes (*Chst2*, *Ass1*, *Kynu*, *Cp*, *Dgat2*, *Sorl1*, *Lap3*),  
246 molecules involved in innate immunity (*Ifit2*, *Il18bp*, *Mefv*, *Lgals3bp*) and  
247 extracellular signaling molecules and their receptors (*Pdgfa*, *Cxcl16*, *Il2rg*,  
248 *Gpr157*). We also looked for transcription factors (TFs) highly expressed in  
249 thymic macrophages and could potentially regulate critical gene networks in  
250 these cells. A total of 25 TFs were highly expressed in thymic macrophages  
251 (>250) and were at least 2-fold higher as compared to the non-thymic

252 macrophages (Table S1). Among them were several TFs involved in type I  
253 interferon (IFN-I) signaling (*Stat1*, *Stat2*, *Irf7*, and *Irf8*) and lipid metabolism  
254 (*Nr1h3*, *Pparg*, *Srebf1*, and *Rxra*) (Fig. 2e). Notably, *Runx3* that is important  
255 for the development and function of cytotoxic T lymphocytes[48], innate  
256 lymphoid cells[49], and Langerhans cells[50] was highly expressed in thymic  
257 macrophages. *Spic* that has well-documented roles in the development of red  
258 pulp macrophages in the spleen, and bone marrow macrophages[51,52] was  
259 also highly expressed in thymic macrophages, further strengthening the  
260 argument for the similarity between thymus, spleen and liver macrophages.  
261 To confirm the expression of *Spic* in thymic macrophages, we analyzed the  
262 thymus of *Spic<sup>GFP</sup>* mice[52]. We found that all *Spic<sup>GFP+</sup>* cells were  
263 macrophages (Fig. S4a and b), making them the most specific thymic  
264 macrophage reporter strain compared with *Lyz2<sup>GFP</sup>*, MAFIA (*Csf1r<sup>GFP</sup>*),  
265 *Cd11c<sup>YFP</sup>*, and *Cx3cr1<sup>GFP</sup>* mice (Fig. S4c-e). However, only ~80% of thymic  
266 macrophages were *Spic<sup>GFP+</sup>* suggesting heterogeneity within the cells (Fig.  
267 S4f and g).

268 Several dominant pathways emerged when we grouped the 500 most  
269 highly expressed genes in thymic macrophages according to gene ontology  
270 (GO) terms (Fig. 2f). It was notable that five of the ten most highly enriched  
271 GO pathways concerned antigen presentation of both exogenous and  
272 endogenous antigens. These data complement our flow cytometry findings of  
273 expression of MHC2 and suggest that thymic macrophages could be potent  
274 antigen-presenting cells and might play a role in negative selection or agonist  
275 selection of thymocytes. Two other highly enriched GO pathways were  
276 involved in lysosomal biogenesis and functions, highlighting the high capacity

277 of these cells to degrade phagocytosed material. Thus, our transcriptional  
 278 analysis has revealed that thymic macrophages are bona fide macrophages  
 279 that bear significant similarity to spleen and liver macrophages and are  
 280 specialized in lysosomal degradation of phagocytosed material and antigen  
 281 presentation.

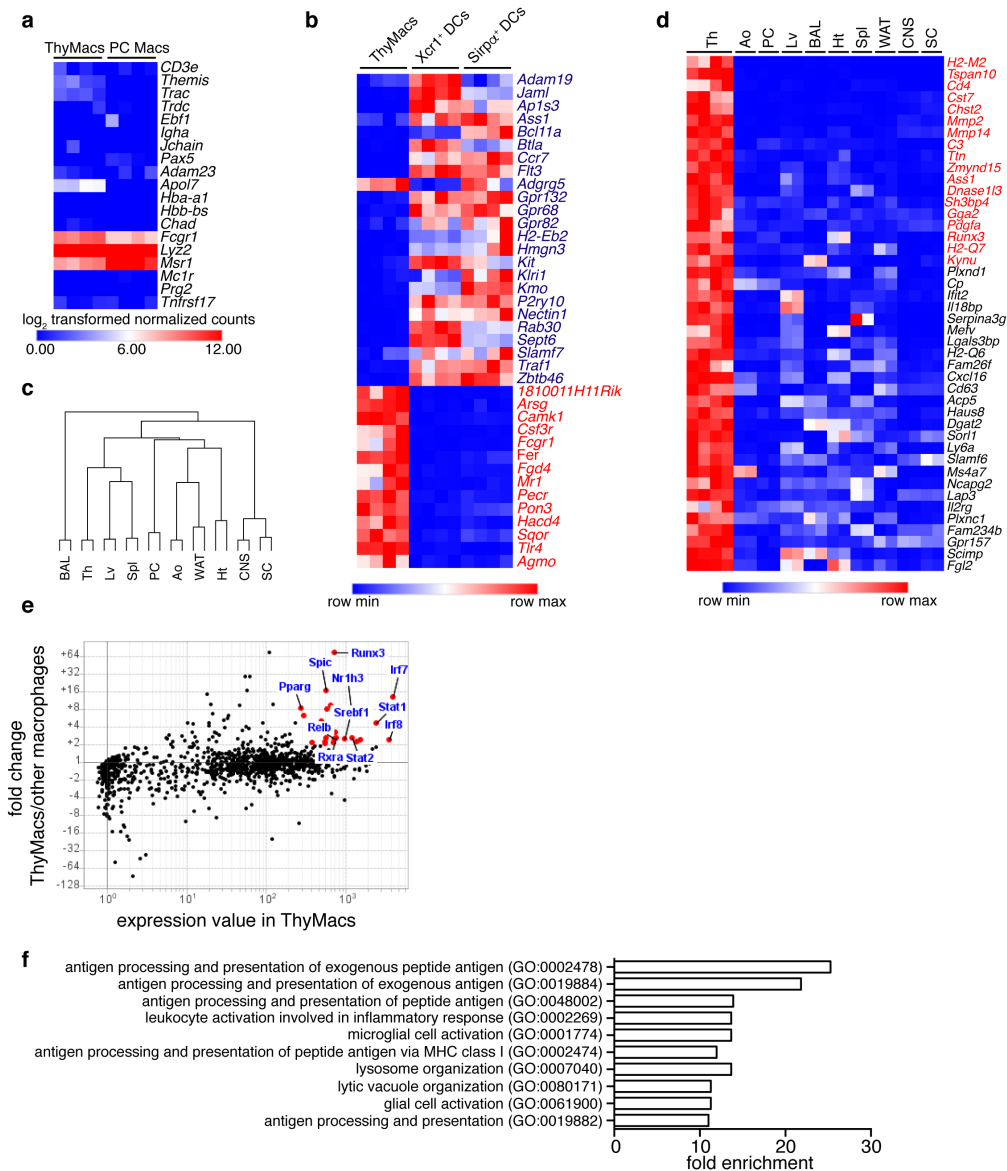

282 **Figure 2. Transcriptional profile of thymic macrophages (ThyMacs). a**

283 Expression of lineage-specific genes in ThyMacs and peritoneal cavity  
 284 macrophages (PC Macs). **b** Expression of cDC-specific genes (gene names in  
 285 blue) and macrophage-specific genes (gene names in red) in ThyMacs and  
 286 two populations of thymic cDCs (ThyDCs) – *Xcr1*<sup>+</sup> ThyDCs and *Sirpa*<sup>+</sup>

287 ThyDCs. **c** Hierarchical clustering of ThyMacs and nine other populations of  
288 tissue-resident macrophages in duplicates. **d** Highly expressed (>500) genes  
289 enriched (>5-fold) in ThyMacs (4 samples) compared to nine other tissue-  
290 resident macrophage populations (two samples each). The genes in red are  
291 >10-fold up-regulated in thymic macrophages. **e** Comparison of the geometric  
292 mean expression of transcription factors in thymic macrophages (4 samples)  
293 and the nine other macrophage populations (2 samples each). Transcription  
294 factors with expression >250 and fold change >2 are marked with red dots. **f**  
295 Top 10 GO pathways in ThyMacs based on the 500 most highly expressed  
296 genes in these cells. Th – ThyMacs, Spl – spleen red pulp macrophages, Lv –  
297 Kupffer cells, BAL – bronchoalveolar lavage macrophages, PC – peritoneal  
298 cavity macrophages, Ao – aorta macrophages, Ht – heart macrophages, WAT  
299 – white adipose tissue macrophages, CNS – central nervous system  
300 microglia, SC – spinal cord microglia.

301

### 302 **Yolk-sac progenitors contribute to embryonic thymic macrophages**

303 The ontogeny of thymic macrophages has been examined by only one  
304 study since the realization that many tissue-resident macrophages are  
305 descendants from embryonic progenitors[37]. Based on *Flt3<sup>Cre</sup>* fate-mapping,  
306 the authors concluded that most adult thymic macrophages derive from  
307 HSCs. To determine if yolk-sac (YS) progenitors contribute to embryonic  
308 thymic macrophages, we used *Cx3cr1<sup>CreER</sup>* fate mapping[53]. Injection of 4-  
309 OHT at E9.5 in *ROSA26<sup>LSL-GFP</sup>* mouse mated with a *Cx3cr1<sup>CreER</sup>* male  
310 permanently tags YS progenitors and their descendants with GFP (Fig. 3a).  
311 Indeed, E19.5 microglia that are exclusively derived from YS progenitors were

312 labeled to a high degree (Fig. 3b). After adjusting for incomplete labeling  
313 based on the microglia, we found that at E15.5 >50% of thymic macrophages  
314 were fate mapped, i. e. from YS origin (Fig. 3c). However, GFP<sup>+</sup> thymic  
315 macrophages decreased to just ~11% at E19.5, suggesting that YS  
316 progenitors establish the embryonic thymic macrophage pool but are quickly  
317 replaced by subsequent wave(s) of fetal liver monocytes or HSC-derived  
318 macrophages.

319 To pinpoint when do the HSC-derived progenitors enter the thymus, we  
320 devised two complementary experiments. First, we evaluated the contribution  
321 of circulating adult monocytes to thymic macrophages without the  
322 confounding effect of radiation damage on the thymus. We created shield  
323 chimeras by subjecting CD45.1 mice to a lethal dose of irradiation while  
324 protecting their upper body and the thymus with a 5 cm lead shield followed  
325 by reconstitution with CD45.2 bone marrow (Fig. 3d). While the donor-derived  
326 monocytes in the blood were, on average 20%, less than 2% of thymic  
327 macrophages were CD45.2<sup>+</sup> (Fig. 3e and f), suggesting a relatively minor  
328 (<10%) contribution of adult circulating monocytes to the thymic macrophage  
329 pool consistent with a previous report[37]. Second, we transplanted E15.5  
330 embryonic thymuses expressing GFP ubiquitously under the control of the  
331 *ROSA26* locus (*ROSA26<sup>GFP</sup>*) under the kidney capsule of adult mice and  
332 analyzed them six weeks later (Fig. 3g). By that time, >99% of thymocytes  
333 were derived from GFP<sup>-</sup> host HSCs (Fig. 3h and i). As a positive control for  
334 donor-derived cells, we used the thymic epithelial cells. The vast majority of  
335 EpCAM<sup>+</sup> thymic epithelial cells (>90%) were still GFP<sup>+</sup>. An identical  
336 proportion of thymic macrophages was also GFP<sup>+</sup>. The results from our



337 transplantation experiments show that the progenitors of almost all thymic  
 338 macrophages are of embryonic origin. Altogether our results suggest that  
 339 resident thymic macrophages are derived from multiple waves of progenitors.  
 340 Initially, the thymus is settled by YS-derived progenitors that contribute  
 341 substantially to the thymic macrophage pool during the embryonic period. In  
 342 parallel with them, YS-independent progenitors infiltrate the thymus before  
 343 E15.5 and establish themselves as the dominant population before birth.  
 344 Adult HSC-derived monocytes contribute relatively little to the pool of thymic  
 345 resident macrophages in young adult mice.

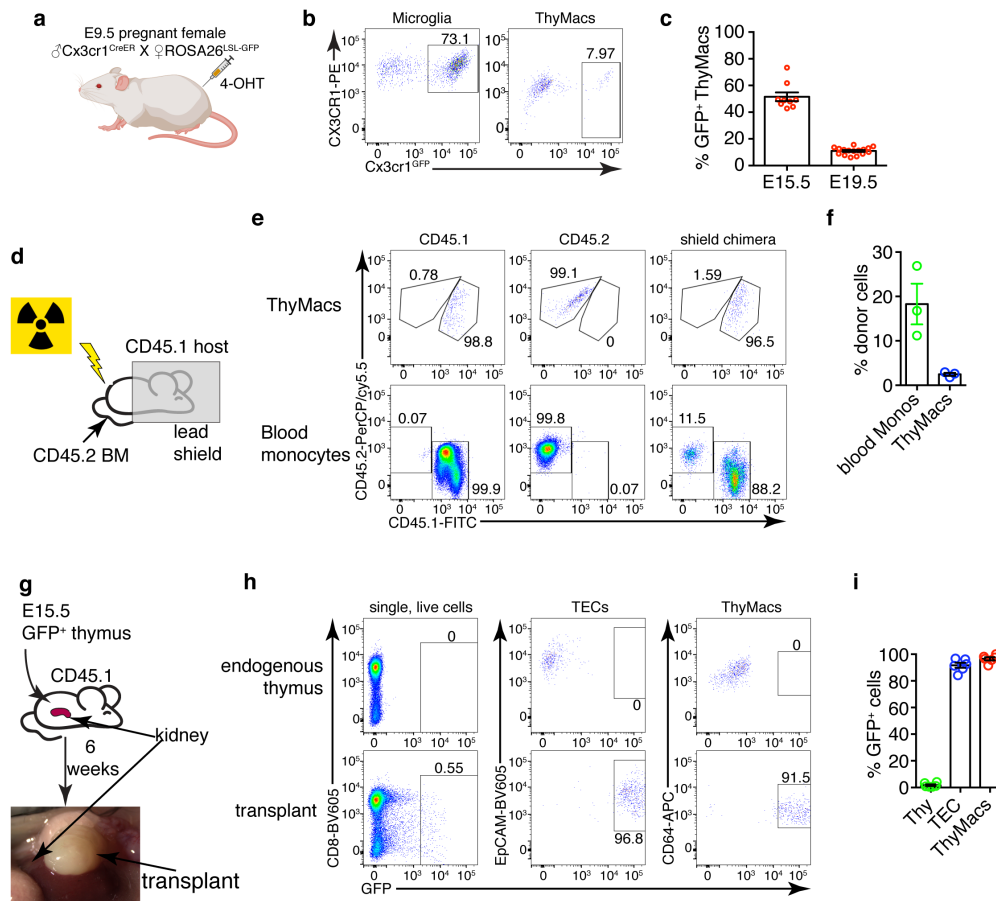

346 **Figure 3. Yolk sac (YS)-derived and non-YS-derived embryonic**  
 347 **progenitors sequentially contribute to the thymic macrophage pool. a**

348 Scheme of the YS-progenitor labeling experiments. E9.5 pregnant

349 *ROSA26<sup>LSL-GFP</sup>* mice mated with *Cx3cr1<sup>CreER</sup>* males were injected with 4-



350 hydroxytamoxifen (4-OHT) and sacrificed at E15.5 or E19.5. **b** Representative  
351 flow cytometry plots of the *Cx3cr1*<sup>GFP</sup> expression in microglia (CD45<sup>+</sup>CD11b<sup>+</sup>  
352 cells in the brain) and ThyMacs of the pups. **c** Frequencies of GFP<sup>+</sup> ThyMacs  
353 at E15.5 and E19.5 adjusted to the degree of labeling of microglia. **d** Scheme  
354 of the shield chimera experiments. Congenic CD45.1 mice were lethally  
355 irradiated with their upper body protected by a 5 cm thick lead shield and then  
356 injected with CD45.2<sup>+</sup> bone marrow. **e** Representative flow cytometric  
357 analysis of ThyMacs and CD115<sup>+</sup>CD11b<sup>+</sup> blood monocytes for donor-derived  
358 (CD45.2<sup>+</sup>) cells. Non-chimeric CD45.1 and CD45.2 samples serve as controls  
359 for the gating. **f** Frequencies of donor-derived ThyMacs and blood  
360 monocytes. **g** Scheme of the thymus transplantation experiments. **h**  
361 Representative flow cytometry plots of GFP expression in thymocytes (Thy),  
362 CD45<sup>-</sup>EpCAM<sup>+</sup> thymic epithelial cells (TECs), and thymic macrophages  
363 (ThyMacs) six weeks after the transplantation. The host thymus (endogenous  
364 thymus) serves as a negative control. The percentages of GFP<sup>+</sup> cells are  
365 indicated in the plots. **i** Frequencies of GFP<sup>+</sup> cells in different cell populations  
366 in the transplanted thymus. Data in **c**, **f**, and **i** are mean±SEM with two litters,  
367 three, and five mice per group, respectively. The numbers in the flow  
368 cytometry plots are the percent of cells in the respective gates. Each dot is an  
369 individual mouse or embryo.

370

### 371 **Thymic macrophages can proliferate in situ**

372 The fact that macrophages can persist for many weeks in the thymus  
373 without constant replacement from blood monocytes suggests that they can  
374 divide in situ. Staining for the proliferation marker Ki-67 revealed that ~4% of

375 the cells expressed this marker compared to an isotype control (Fig. 4a and  
376 b). To obtain further proof that thymic macrophages are proliferative, we  
377 tested the incorporation of the nucleotide analog 5-Ethynyl-2'-deoxyuridine  
378 (EdU). Short-term EdU labeling experiments unexpectedly revealed that  
379 thymic macrophages become EdU<sup>+</sup> with faster kinetics than thymocytes (Fig.  
380 4c). The most likely explanation for this puzzling result is that some of the  
381 thymic macrophages have engulfed apoptotic thymocytes that have recently  
382 divided and incorporated EdU. Thus, EdU could have accumulated in these  
383 macrophages through phagocytosis and not through cell division. To  
384 circumvent this caveat, we designed a pulse-chase experiment (Fig. 4d).  
385 Mice were injected daily with EdU for 21 days so that all cells that proliferate  
386 in that period would incorporate the label. The vast majority of thymocytes  
387 and thymic macrophages became EdU<sup>+</sup> at d. 21 (Fig. 4e). After 21 more days  
388 of "chase period", only ~0.2% of thymocytes had retained the EdU label,  
389 consistent with the existence of a very small population of long-term resident  
390 thymocytes consisting mainly of regulatory T cells and NKT cells[54] (Fig. 4e  
391 and f). However, ~5% of the thymic macrophages were EdU<sup>+</sup>, suggesting  
392 they divided during the labeling period. Finally, we sorted thymic  
393 macrophages and subjected them to cell cycle analysis. Although almost all  
394 thymic macrophages were in G0/G1 phase, a small population of ~3% was in  
395 G2/M phase of the cell cycle (Fig. 4g and h). Collectively, three independent  
396 approaches documented that 3-5% of thymic macrophages are actively  
397 dividing under homeostatic conditions within the thymus. These findings can  
398 explain the long-term maintenance of these cells within the organ without a  
399 constant influx of progenitors.

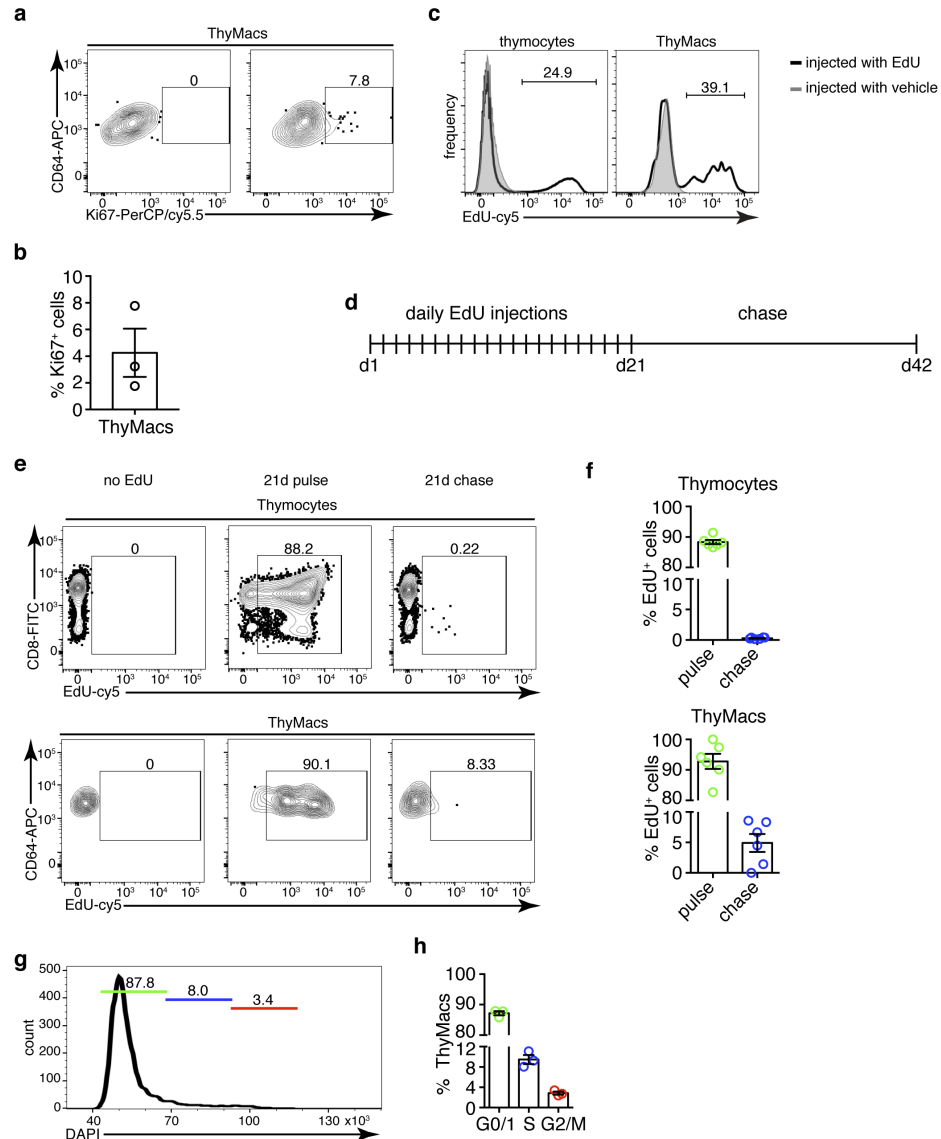

400 **Figure 4. Thymic macrophages exhibit a low degree of proliferation. a**

401 Example flow cytometry plots of Ki67 staining of thymic macrophages

402 (ThyMacs). **b** Frequency of Ki67<sup>+</sup> thymic macrophages. **c** Example flow

403 cytometry plots of the EdU accumulation in thymocytes and thymic

404 macrophages 2 hours after 1 mg EdU i.p. or vehicle injection. The numbers

405 inside flow plots are the percentage of EdU<sup>+</sup> cells from mice injected with

406 EdU. Data are representative of three independent experiments. **d** Scheme of

407 EdU pulse/chase experiment: mice were injected daily with 1 mg EdU i.p for

408 21 days and then rested for 21 more days. **e** Example flow cytometry plots of

409 EdU staining of thymocytes (upper row) and ThyMacs (lower row). **f**  
410 Frequencies of EdU<sup>+</sup> cells among thymocytes (top graph) and ThyMacs  
411 (bottom graph). **g** Example flow cytometry plot of cell cycle analysis of FACS  
412 sorted ThyMacs. **h** Frequencies of ThyMacs in different stages of the cell  
413 cycle. The numbers in the flow cytometry plots are the percent of cells in the  
414 respective gates. Data are mean±SEM from three mice (**b** and **h**) or 6-7  
415 individual mice (**f**). Each dot is an individual mouse.

416

### 417 **Expression of *Timd4* and *Cx3cr1* can distinguish two populations of** 418 **thymic macrophages**

419 To determine if thymic macrophages are heterogeneous, we turned to our  
420 scRNA-Seq data. Once we zoomed onto *Mafb* expressing cells, we could  
421 distinguish three separate populations: 1) monocytes that expressed high  
422 levels of *Ly6c2* and *Itgam* (CD11b) but did not express *Mertk*; 2) *Timd4*<sup>+</sup>  
423 (encoding TIM4) macrophages that also expressed high levels of *Spic* and  
424 *Slc40a1*, but low levels of *Cx3cr1*; 3) *Cx3cr1*<sup>+</sup> macrophages that expressed  
425 low levels of *Timd4*, *Spic*, and *Slc40a1* (Fig. 5a and b). Both macrophages  
426 and monocytes expressed *Fcgr1* (CD64). A minority of macrophages  
427 expressed high levels of *Mki67*, indicating that they might be proliferating,  
428 corroborating our earlier data. Interestingly, most of the *Mki67* expressing  
429 macrophages belonged to the *Cx3cr1*<sup>+</sup> population.

430 We confirmed the results from scRNA-Seq by flow cytometry. We could  
431 identify discrete TIM4<sup>+</sup>*Cx3cr1*<sup>GFP-</sup> and TIM4<sup>-</sup>*Cx3cr1*<sup>GFP+</sup> macrophages (Fig.  
432 5c). There was even TIM4<sup>+</sup>*Cx3cr1*<sup>GFP+</sup> intermediate population that could not  
433 be distinguished in the scRNA-Seq dataset, likely because of the lack of

434 statistical power. To determine the localization of the two distinct macrophage  
435 populations, we stained thymic sections from *Cx3cr1<sup>GFP</sup>* mice with an antibody  
436 to MerTK. The *Cx3cr1<sup>GFP-</sup>* MerTK<sup>+</sup> cells correspond to *Timd4<sup>+</sup>* macrophages,  
437 while the *Cx3cr1<sup>GFP+</sup>* MerTK<sup>+</sup> cells would be the *Cx3cr1<sup>GFP+</sup>* macrophages.  
438 Strikingly, the two macrophage populations showed distinct localization.  
439 *Timd4<sup>+</sup>* macrophages were located in the cortex, while the *Cx3cr1<sup>GFP+</sup>*  
440 macrophages resided in the medulla and the cortico-medullary junction (Fig.  
441 5d).

442 To better understand the differences between the two populations of thymic  
443 macrophages, we looked for differentially expressed genes. We included the  
444 thymic monocytes in the comparison, as these cells clustered the closest to  
445 macrophages. *Timd4<sup>+</sup>* macrophages expressed the highest levels of the  
446 transcription factors *Spic*, *Maf*, and *Nr1h3*; the receptors for apoptotic cells  
447 *Axl*, *Mertk*, and *Timd4*; and many Slc transporters such as *Slc40a1*, *Slc1a3*,  
448 *Slco2b1*, *Slc11a1*, and *Slc7a7* (Fig. 5e and Table S2). *Cx3cr1<sup>+</sup>* macrophages  
449 expressed high levels of the transcription factor *Runx3*; a distinct set of  
450 phosphatidylserine receptors such as *Stab1*, *Anxa5*, and *Anxa3*; many  
451 degradative enzymes such as *Mmp2*, *Mmp14*, *Dnase1l3*, *Acp5*, *Lyz2*, *Ctsz*,  
452 *Ctss*, *Ctsd*, *Ctsl*; cytokines such as *Pdgfa*, *Cxcl16*, and *Ccl12*; and molecules  
453 involved in MHC1 antigen presentation such as *B2m*, *H2-M2*, *H2-K1*, *H2-Q7*.  
454 Thymic monocytes were characterized by differential expression of the typical  
455 monocyte genes *Ly6c2*, *Ccr2*, and *S100a4*, and genes involved in MHC2  
456 antigen presentation such as *Ciita*, *H2-DMb1*, *H2-Ab1*, and *Cd74*.

457

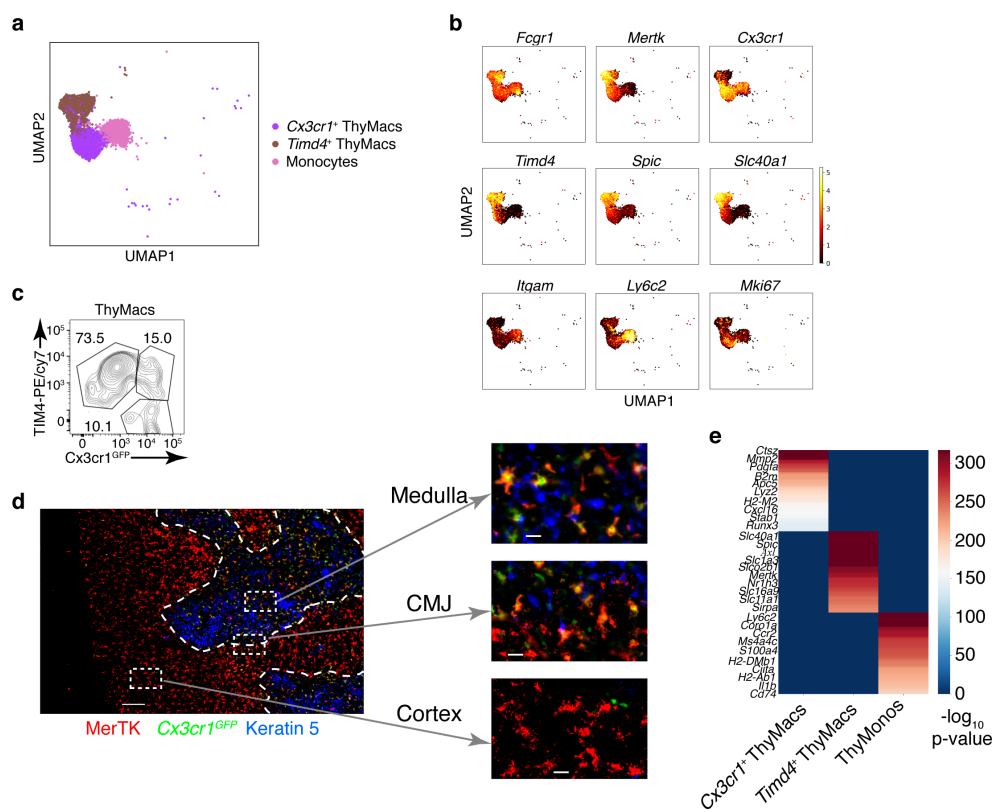

458 **Figure 5: Two populations of macrophages with distinct localization**  
 459 **exist in the thymus.** **a** UMAP clusters from Fig. S2 with high expression of  
 460 the transcription factor *Mafb* fall into three groups: monocytes, *Timd4*<sup>+</sup>  
 461 macrophages, and *Cx3cr1*<sup>+</sup> macrophages. **b** Expression of the indicated  
 462 genes in the three *Mafb*-positive clusters. **c** A flow cytometry plot of *Cx3cr1*<sup>GFP</sup>  
 463 and TIM4 expression in ThyMacs. The plot is representative of >10 individual  
 464 experiments. The numbers inside the plot are the percentages of the cell  
 465 populations in the respective gates. **d** Immunofluorescent staining of the  
 466 thymus of *Cx3cr1*<sup>GFP</sup> mouse stained with MerTK (a marker for all  
 467 macrophages) and Keratin 5 (a marker for medulla). The scale bar is 150  $\mu$ m.  
 468 Areas in the cortex, medulla, and the cortico-medullary junction (CMJ)  
 469 represented by the dashed boxes are enlarged below to show the co-  
 470 localization of *Cx3cr1*<sup>GFP</sup> and MerTK signal in CMJ and medulla, but not in  
 471 cortex. The scale bars in the images below are 20  $\mu$ m. The images are

472 representative of three individual mice. **e** Differentially expressed genes  
473 among *Timd4*<sup>+</sup> thymic macrophages, *Cx3cr1*<sup>+</sup> thymic macrophages, and  
474 thymic monocytes. The negative log<sub>10</sub> p-values for the genes expressed in  
475 each cluster were calculated as described in the Materials and Methods, and  
476 the top 50 differentially expressed genes were plotted in the figure. Ten of  
477 these genes are listed on the left.

478

#### 479 ***Cx3cr1*<sup>+</sup> cells give rise to *Timd4*<sup>+</sup> cells during embryonic development**

480 To determine if the two populations of thymic macrophages are related, we  
481 first analyzed the kinetics of their appearance during embryonic development.  
482 At the earliest time point (E14.5), all thymic macrophages were *Cx3cr1*<sup>+</sup>, and  
483 only ~20% of them were also TIM4<sup>+</sup> (Fig. 6a and b). The proportion of TIM4<sup>+</sup>  
484 cells increased at E17.5, and TIM4<sup>+</sup>*Cx3cr1*<sup>-</sup> cells started to appear. In the  
485 neonatal period, almost all macrophages were TIM4<sup>+</sup>, and very few remained  
486 TIM4<sup>-</sup>. The proportion of TIM4<sup>-</sup> cells increased in 6 weeks old mice, but TIM4<sup>+</sup>  
487 macrophages remained the dominant population. These kinetics (Fig. 6c) are  
488 consistent with *Timd4*<sup>+</sup> macrophages developing from *Cx3cr1*<sup>+</sup> cells before  
489 birth. Another plausible scenario is that distinct progenitors give rise to  
490 different thymic macrophages populations (e.g., YS-progenitors give rise to  
491 *Cx3cr1*<sup>+</sup>*Timd4*<sup>-</sup> and HSC-derived progenitors develop into *Timd4*<sup>+</sup>  
492 macrophages). To test the latter hypothesis, we re-visited the fate mapping of  
493 YS progenitors results (Fig. 3a). Although a larger part (~60% at E15.5) of  
494 *Cx3cr1*<sup>+</sup>TIM4<sup>-</sup> cells were derived from YS progenitors (Fig. 6d), a substantial  
495 proportion (~40% at E15.5) of YS-derived TIM4<sup>+</sup> macrophages could clearly  
496 be identified at both E15.5 and E19.5, suggesting that YS progenitors can



497 give rise to both *Cx3cr1*<sup>+</sup> and *Timd4*<sup>+</sup> cells. Extrapolating from the data, the  
 498 non-YS-derived progenitors (GFP<sup>-</sup> cells) can also give rise to both *Timd4*<sup>-</sup> and  
 499 *Timd4*<sup>+</sup> cells. Thus, the simplest explanation for our findings is that *Timd4*<sup>+</sup>  
 500 cells develop from *Cx3cr1*<sup>+</sup> cells during embryonic development. This  
 501 transition is complete in the first week after birth as there were essentially no  
 502 *Cx3cr1*<sup>+</sup> thymic macrophages remaining at d.7 (Fig. 6a and b).

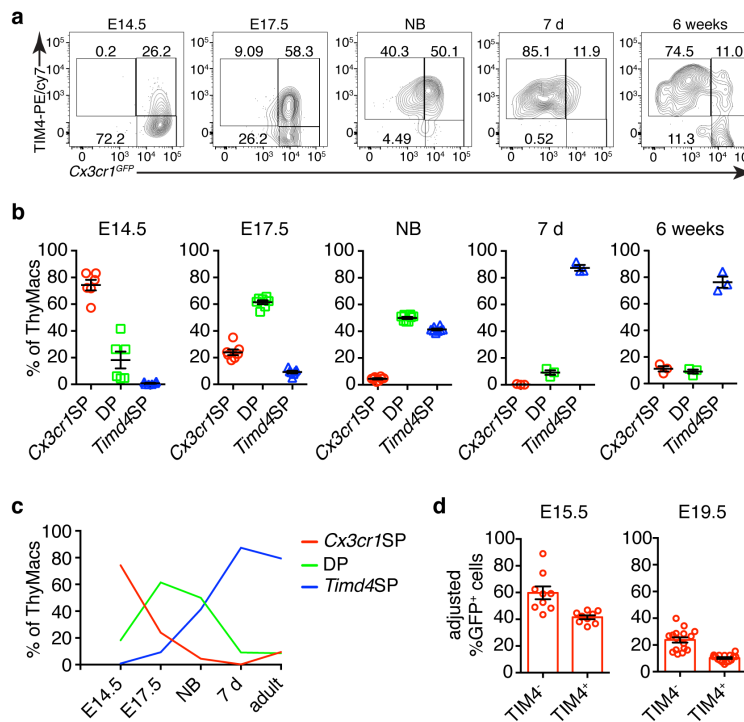

503

504 **Figure 6. *Timd4*<sup>+</sup> thymic macrophages are derived from *Cx3cr1*<sup>+</sup> cells**

505 **during embryonic development. a** Example flow cytometry plots for the

506 expression of *Cx3cr1*<sup>GFP</sup> and TIM4 on thymic macrophages at different times

507 during embryonic development (E14.5, E17.5), immediately after birth, at 7

508 days, and 6 weeks of age. **b** Frequencies of *Timd4*<sup>+</sup>*Cx3cr1*<sup>-</sup> (*Timd4* single-

509 positive or *Timd4*SP), *Timd4*<sup>+</sup>*Cx3cr1*<sup>+</sup>(double-positive or DP), and

510 *Cx3cr1*<sup>+</sup>*Timd4*<sup>-</sup> (*Cx3cr1* single-positive or *Cx3cr1*SP) thymic macrophages at

511 the indicated time points. **c** Kinetics of the changes in different subpopulations

512 of thymic macrophages from E14.5 to 6 weeks. **d** Frequencies at E15.5 and



513 E19.5 of GFP-labeled cells among *TIM4*<sup>+</sup> or *TIM4*<sup>-</sup> cells in *Cx3cr1*<sup>CreER</sup> X  
514 *ROSA26*<sup>LSL-GFP</sup> embryos treated with 4-OHT at E9.5. Data is from at least two  
515 independent experiments for each panel. Each symbol is an individual mouse  
516 or embryo.

517

518 ***Timd4*<sup>+</sup> thymic macrophages self-maintain, while *Cx3cr1*<sup>+</sup> cells slowly**  
519 **accumulate with age**

520 To understand how are the resident thymic macrophage populations  
521 maintained during adult life, we induced recombination in *Cx3cr1*<sup>CreER</sup> X  
522 *ROSA26*<sup>LSL-GFP</sup> mice during the neonatal period (Fig. 7a) or at 6 weeks of age  
523 (Fig. 7c) and compared the proportion of GFP<sup>+</sup> cells 3 and 42 days after  
524 labeling. The extent of labeling of *Timd4*<sup>+</sup> thymic macrophages did not  
525 change within these 6 weeks, no matter whether the mice were treated with  
526 Tamoxifen in the first week after birth or at 6 weeks (Fig. 7b and d),  
527 suggesting steady-state maintenance and absence of a significant influx from  
528 unlabeled cells (e.g., monocytes). In contrast, the proportion of labeled  
529 *Timd4*<sup>+</sup> thymic macrophages decreased significantly 6 weeks after Tamoxifen  
530 injection in both neonatal and adult mice, suggesting that this population was  
531 being diluted by unlabeled cells. To further substantiate these findings, we  
532 examined older WT mice and found out that the proportions of *Timd4*<sup>+</sup> thymic  
533 macrophages increased with age, and in mice >8 months old, they accounted  
534 for ~70% of all macrophages in the organ (Fig. 7e). Thus, we conclude that  
535 *Timd4*<sup>+</sup> macrophages can maintain themselves for long periods in the cortex  
536 of the thymus, Since the first week of life, *Cx3cr1*<sup>+</sup> cells are slowly being  
537 recruited to the medulla and cortico-medullary junction, and in aging mice

538 form the predominant phagocytic population in the organ.

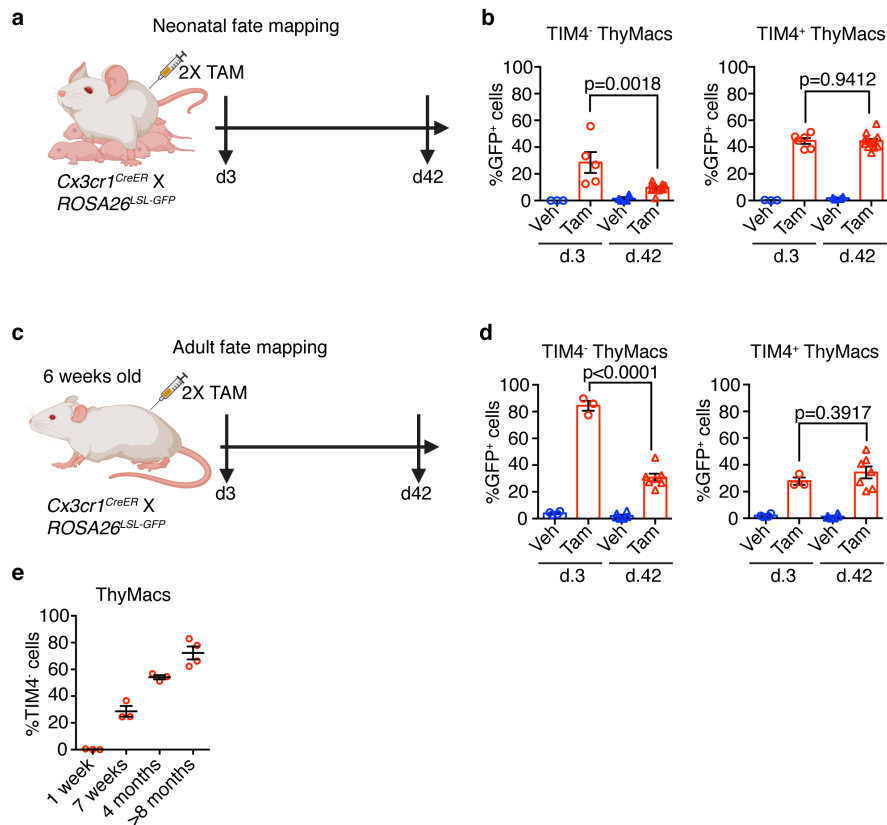

539

540 **Figure 7. *Timd4*<sup>+</sup> thymic macrophages self-maintain during adult life,**  
 541 **while *Cx3cr1*<sup>+</sup> cells slowly accumulate with age. a** Scheme of the neonatal  
 542 fate mapping: A nursing dam was injected twice with Tamoxifen (Tam) or  
 543 vehicle (Veh) in the first week after giving birth to *Cx3cr1<sup>CreER</sup> X ROSA26<sup>LSL-</sup>*  
 544 *GFP* pups. Three or 42 days after the last injection, the pups were sacrificed,  
 545 and the degree of labeling of *Timd4*<sup>+</sup> and *Timd4*<sup>-</sup> thymic macrophages was  
 546 examined by flow cytometry. **b** Frequencies of GFP<sup>+</sup> *Timd4*<sup>+</sup> or *Timd4*<sup>-</sup> thymic  
 547 macrophages from neonatally fate mapped mice after 3 and 42 days. Vehicle  
 548 injected nursing dam litters (Veh) served as a control for non-specific labeling.  
 549 **c** Scheme of the adult fate mapping: Six weeks old *Cx3cr1<sup>CreER</sup> X ROSA26<sup>LSL-</sup>*  
 550 *GFP* mice were injected twice with Tamoxifen (Tam) or vehicle (Veh). Three or  
 551 42 days after the last injection, the mice were sacrificed, and the degree of  
 552 labeling of *Timd4*<sup>+</sup> and *Timd4*<sup>-</sup> thymic macrophages was examined by flow

553 cytometry. **d** Frequencies of GFP<sup>+</sup> *Timd4*<sup>+</sup> or *Timd4*<sup>-</sup> thymic macrophages  
554 from adult fate mapped mice after 3 and 42 days. **e** Frequencies of TIM4<sup>-</sup>  
555 thymic macrophages at different ages. The data is mean±SEM from 2  
556 independent experiments (**b**) or at least 3 individual mice per time point (**d** and  
557 **e**). Each symbol is an individual mouse. Statistical significance was  
558 determined with unpaired Student's t-test.

559

## 560 **Discussion**

561 Here, we have described the phenotype, transcriptional profile, localization,  
562 diversity, ontogeny, and maintenance of macrophages in the thymus. These  
563 cells express the typical macrophage markers CD64, MerTK, and F4/80 and  
564 are transcriptionally most similar to splenic red pulp macrophages and liver  
565 Kupffer cells. However, they have a unique expression profile dominated by  
566 genes involved in antigen presentation and lysosomal degradation. We found  
567 that thymic macrophages consist of two populations with distinct localization.  
568 *Timd4*<sup>+</sup> macrophages occupied the cortex, while *Cx3cr1*<sup>+</sup> cells were located in  
569 the medulla and the cortico-medullary junction. While YS-derived  
570 macrophages dominated the early stages of thymus development, they were  
571 quickly replaced by non-YS embryonic progenitors that gave rise to the  
572 *Timd4*<sup>+</sup> thymic macrophages that could proliferate and self-maintain. *Cx3cr1*<sup>+</sup>  
573 macrophages started slowly accumulating after birth and in old mice became  
574 the most abundant population.

575 Altogether our data depict thymic macrophages as typical tissue-resident  
576 macrophages with origin from multiple hematopoietic waves, ability to self-  
577 maintain, and expression of the core macrophage-specific genes. They were

578 most similar transcriptionally to splenic red pulp macrophages and Kupffer  
579 cells, which is not surprising considering that they all specialize in  
580 efferocytosis and have efficient lysosomal degradation machinery. These  
581 three populations also shared expression of the transcription factor *Spic* that  
582 is induced by heme released following red blood cells phagocytosis[52].  
583 However, the thymus is not known as a place for erythrocyte degradation.  
584 Thus the mechanism for *Spic* up-regulation in thymic macrophages is unclear.

585 The unique features of thymic macrophages include high expression of  
586 genes involved in the IFN-I pathway, antigen presentation, and lysosomal  
587 degradation. The up-regulation of IFN-I-stimulated genes such as *Stat1*,  
588 *Stat2*, *Irf7*, and *Irf8* can be explained by the constitutive secretion of IFN-I by  
589 thymic epithelial cells[55,56]. The purpose of IFN-I expression in the thymus  
590 in the absence of a viral infection is unclear. Still one possibility is that it  
591 mediates negative selection to IFN-dependent genes as part of central  
592 tolerance.

593 Thymic macrophages highly express molecules involved in antigen  
594 presentation, including MHC1 and MHC2, although the latter is expressed at  
595 lower levels than in cDCs. Thus, they have the potential to present antigens  
596 for both negative selection and agonist selection. These two activities have  
597 traditionally been assigned solely to cDCs[57]. However, recent evidence  
598 suggests that negative selection is most efficient when the cell that presents  
599 the antigen to auto-reactive thymocytes is also the one that phagocytoses  
600 it[58]. So, macrophages participation in thymocyte selection needs to be re-  
601 evaluated with optimized isolation procedures and specific genetic tools.

602 The extraordinary ability of thymic macrophages to engulf and degrade  
603 apoptotic thymocytes has been appreciated for a long time[31], and our RNA-  
604 Seq data provides additional supporting evidence for this function by  
605 highlighting the up-regulation of pathways involved in lysosomal degradation.  
606 An interesting topic for future research would be to understand how the  
607 metabolites derived from apoptotic cells are returned to the microenvironment  
608 to support the proliferation of immature thymocytes. A *SoLute Carrier (Slc)*  
609 genes-based program has been described in vitro[59], but its relevance to  
610 tissue-resident macrophages remains to be determined. Altogether, our study  
611 demonstrates that thymic macrophages are a unique subset of tissue-resident  
612 macrophages and support the idea that resident macrophage phenotype is  
613 determined by the combination of ontogeny, microenvironment, and other  
614 factors[60].

615 Together with the study by Tacke et al., our work builds the following model  
616 for thymic macrophage origin[37]: Thymic macrophages develop in three  
617 distinct waves: YS-derived progenitors dominate the early stages of thymus  
618 development but are replaced before birth by a second wave of YS-  
619 independent embryonic progenitors that forms the bulk of thymic  
620 macrophages after birth and can self-maintain into adulthood. With age, there  
621 is a slow and steady influx of *Timd4*<sup>+</sup>*Cx3cr1*<sup>+</sup> macrophage precursors that  
622 occupy the medulla and cortico-medullary junction, becoming the major  
623 phagocytic population in the thymus of older mice (>8 months). The second  
624 wave of YS-independent macrophages is most likely the progeny of  
625 embryonic HSCs based on *Flt3*<sup>Cre</sup> fate mapping that showed that >80% of  
626 thymic macrophages in adult mice are descendants of HSCs[37]. Whether

627 HSC-independent fetal liver monocytes contribute to thymic macrophages and  
628 to what extent awaits the creation of models that can specifically target this  
629 population of progenitors. Recruitment of circulating monocytes to the resident  
630 macrophage pool in the thymus has been ruled out previously by parabiosis  
631 and *Ccr2*<sup>-/-</sup> mice[37]. Our shield chimera experiments have arrived at similar  
632 conclusions. However, the relatively short duration of these experiments and  
633 their focus on the bulk thymic macrophages have prevented the recognition of  
634 the gradual accumulation of *Timd4*<sup>-</sup> macrophages. Once we zoomed in on this  
635 minor cell population in young mice, the fate mapping clearly showed an influx  
636 of unlabeled progenitors. Whether the progenitors of *Timd4*<sup>-</sup> macrophages  
637 are monocytes remains to be formally demonstrated. However, in all  
638 macrophage populations exhibiting replacement in adults examined to date,  
639 monocytes have been singled out as the source[12,19,22,24,25,30]. An  
640 alternative possibility involves thymocyte progenitors that under certain  
641 circumstances have been shown to differentiate into macrophages and  
642 granulocytes in the thymus[42,43]. However, if this occurs in unmanipulated  
643 mice at a steady-state remains unclear.

644 The strict spatial segregation of the two macrophage populations in the  
645 thymus implies that they might have distinct functions. *Timd4*<sup>+</sup> cells are  
646 restricted to the cortex and are particularly abundant in the deeper cortex,  
647 close to the medulla. Both positive and negative selection of thymocytes occur  
648 there, so we speculate that *Timd4*<sup>+</sup> macrophages might be specialized in  
649 efferocytosis of CD4<sup>+</sup>CD8<sup>+</sup> (double-positive) thymocytes that cannot interact  
650 with cortical thymic epithelial cells and die by neglect or are auto-reactive and  
651 undergo clonal deletion in the cortex[61]. On the other hand, *Cx3cr1*<sup>+</sup>

652 macrophages accumulate in the medulla; the thymic region specialized in  
653 negative selection to tissue-restricted antigens (TRA). They might contribute  
654 to the process in several ways: 1) by carrying TRAs from blood and peripheral  
655 organs. A similar process has been described for cDC2 (SIRP $\alpha$ <sup>+</sup> DCs)[62]. In  
656 fact, *Cx3cr1*<sup>+</sup> thymic macrophages could have contributed to this role because  
657 they were not distinguished from cDC2 in this study. 2) By capturing TRAs  
658 from *Aire*<sup>+</sup> medullary thymic epithelial cells and presenting them to auto-  
659 reactive thymocytes as shown for DCs[63-65]. 3) By phagocytosing apoptotic  
660 TRA-specific medullary thymocytes, a process we have observed before[58].  
661 The exact involvement of thymic macrophages in the selection events in the  
662 thymus remains to be determined.

663 The accumulation of the *Cx3cr1*<sup>+</sup> cells in older mice has clear implications  
664 for thymus aging. One key feature of thymus involution is the accumulation of  
665 extracellular matrix produced by fibroblasts and the emergence of white  
666 adipocytes[66]. The *Cx3cr1*<sup>+</sup> subset is the predominant producer of the growth  
667 factor PDGF $\alpha$  that is required for the maintenance of adipocyte stem cells and  
668 can stimulate tissue fibrosis[67,68]. The gradual accumulation of *Cx3cr1*<sup>+</sup>  
669 macrophages could increase the availability PDGF $\alpha$  in the aging thymus  
670 stimulating extracellular matrix production and differentiation of precursors  
671 into adipocytes. This model predicts that limiting the influx of *Cx3cr1*<sup>+</sup>  
672 macrophage precursors could delay thymus involution.

673 Recent work described a novel phagocytic and antigen-presenting cell type  
674 in the thymus called monocyte-derived DCs[65]. The phenotype of these cells  
675 overlaps with the CD64<sup>+</sup>F4/80<sup>lo</sup>CD11b<sup>+</sup> cells in our study. However, we favor  
676 the classification of these cells as monocytes based on their expression of

677 *Mafb*, CD64, and Ly6C (Fig. 5b) and lack of expression of the defining DC  
678 transcription factor *Zbtb46* (Fig. S2c)[69]. As monocytes can differentiate into  
679 cDC2, particularly in the context of inflammation[70], the precise identity and  
680 the relationship of this population to thymic cDC2 remain to be established.

681 In the past several years, scRNA-Seq has come to the forefront of  
682 biologists' efforts to disentangle the cellular diversity of tissues. Several  
683 comprehensive studies have included samples from mouse or human  
684 thymus[71-73]. However, in these studies, too few thymic macrophages were  
685 sampled to give meaningful clustering results. Efforts specifically targeting  
686 the thymus have provided considerably more information[74,75], but  
687 macrophage diversity was still not recognized. Characterization of rare  
688 populations such as thymic macrophages (~0.1% of all cells in the thymus)  
689 requires optimized enzymatic digestion procedures and enrichment strategies,  
690 as has been demonstrated already for thymic epithelial cells[76,77]. Our  
691 scRNA-Seq dataset provides a rich resource for the unbiased characterization  
692 of myeloid cells in the thymus and will greatly aid in the understanding of the  
693 myeloid landscape of the thymus.

694 In summary, our work comprehensively characterizes macrophages in the  
695 thymus and paves the way for exploration of their functions.

696

## 697 **Materials and methods**

### 698 **Mice**

699 C57BL/6Narl (CD45.2) mice were purchased from the National Laboratory  
700 Animal Center, Taipei, Taiwan. MAFIA (MAcrophage Fas-Induced Apoptosis)  
701 [78], *Cx3cr1<sup>GFP</sup>* [79], *Spic<sup>GFP</sup>* [52], *Cx3cr1<sup>CreER</sup>* [53], and *B6.SJL-Ptprca*



702 *Pepcb/BoyJ* (CD45.1) mice were purchased from the Jackson Laboratories.  
703 *Cd11c<sup>YFP</sup>* [80] and *Lyz2<sup>GFP</sup>* [81] mice have been described. Mice ubiquitously  
704 expressing GFP from the *ROSA26* locus were generated by breeding  
705 *Pdgfra<sup>Cre</sup>* [82] and *ROSA26<sup>LSL-ZsGreen</sup>* (also known as *ROSA26<sup>LSL-GFP</sup>* or Ai6)  
706 mice[83] (both from the Jackson Laboratories). A mouse from this cross was  
707 identified, in which the STOP cassette was deleted in the germline. It was  
708 designated *ROSA26<sup>GFP</sup>* and subsequently bred to C57BL/6 mice. All mice  
709 were used at 4-10 weeks of age unless otherwise specified. Mice were bred  
710 and maintained under specific pathogen-free conditions at the animal facility  
711 of National Yang-Ming University. All experimental procedures were approved  
712 by the Institutional Animal Care and Use Committee (IACUC) of National  
713 Yang-Ming University.

714

#### 715 **Treatment with 5-Ethynyl-2'-deoxyuridine (EdU)**

716 Mice were i.p. injected with 1 mg EdU (Carbosynth) dissolved in PBS daily  
717 for 21 days and then rested for 21 more days. Cells from the thymus were  
718 harvested on day 21 or 42. In some experiments, the mice were sacrificed 2  
719 hours after the first EdU injection.

720

#### 721 **Shield chimera generation**

722 CD45.1 mice were anesthetized by i.p. injection of 120 µg/g body weight  
723 Ketamine hydrochloride (Toronto Research Chemicals) and 12 µg/g body  
724 weight Xylazine hydrochloride (Sigma). Anesthetized mice were taped to a 5  
725 cm thick lead block so that the lead block covered the head and the chest  
726 down to the bottom of the rib cage. Then, they were irradiated with a lethal

727 dose (1000 rad) from a  $^{137}\text{Cs}$  source (Minishot II, AXR) so that only their  
728 abdomen and hind legs were exposed. After recovery from anesthesia, the  
729 mice were transfused i.v. with  $10^7$  bone marrow cells from a congenic  
730 (CD45.2) donor. Then, they were given Trimerin (0.5 mg/mL Sulfadiazine +  
731 0.1 mg/mL Trimethoprim, China Chemical and Pharmaceutical Co., Tainan,  
732 Taiwan) in the drinking water for the first two weeks after the irradiation and  
733 analyzed after six weeks.

734

### 735 **Cell isolation from thymus, blood, and peritoneal cavity**

736 Thymocytes were obtained by mechanical disruption of the thymus with a  
737 syringe plunger. For myeloid cell isolation, mouse thymuses were cut into  
738 small pieces and digested with 0.2 mg/mL DNase I (Roche) and 0.2 mg/mL  
739 collagenase P (Roche) in complete DMEM for 20 min at 37°C with frequent  
740 agitation. 1.6 mg/mL Dispase I (ThermoFisher) was added to the enzymatic  
741 mixture for thymic epithelial cell isolation. In some experiments, thymic  
742 myeloid cells and thymic epithelial cells were enriched by 57% Percoll PLUS  
743 (GE Healthcare) discontinuous gradient centrifugation at 4°C, 1800 rpm, for  
744 20 min without brake. Cells at the interface were collected and washed with  
745 PBS to remove residual silica particles. Then the cells were resuspended in  
746 PBS with 0.5% BSA (HM Biological), filtered through a 70  $\mu\text{m}$  filter, and kept  
747 on ice.

748

749 Blood was isolated by cardiac puncture of sacrificed mice and immediately  
750 diluted with PBS. After centrifugation, the cell suspensions were treated with  
751 ammonium chloride-potassium lysis buffer for 3 min on ice once or twice.

752 Peritoneal cavity cells were obtained by lavage with 5 mL PBS + 2 mM EDTA  
753 (Merck). Following gentle massage, the cavity was opened with an abdominal  
754 incision, and lavage fluid was collected.

755

### 756 **Flow cytometry**

757 Single-cell suspensions ( $0.5 - 2 \times 10^6$  cells) from thymus, blood, or  
758 peritoneal cavity were blocked with supernatant from 2.4G2 hybridoma (a kind  
759 gift by Dr. Fang Liao, Academia Sinica, Taipei, Taiwan) and stained with  
760 fluorochrome- or biotin-labeled antibodies for 20 min on ice in PBS + 0.5%  
761 BSA + 2 mM EDTA + 0.1% NaN<sub>3</sub> (FACS buffer). The following antibodies  
762 were used: CD11b (clone M1/70), MHC2 (M5/114.15.2), CD11c (N418),  
763 F4/80 (BM8), CD115 (AFS98), SIRP $\alpha$  (P84), CD45 (30-F11), NK1.1 (PK136),  
764 TIM4 (RMT4-54), Gr-1 (RB6-8C5), CD64 (X54-5/7.1), Siglec H (551), Ly6C  
765 (HK1.4), CD3 $\epsilon$  (145-2C11), CD8 $\alpha$  (53-6.7), CD19 (6D5), B220 (RA3-6B2),  
766 CD4 (GK1.5), CD51 (RMV-7), CD45.1 (A20), CD45.2 (104), CX3CR1  
767 (SA011F11), and EpCAM (G8.8) from BioLegend; Axl (MAXL8DS), MerTK  
768 (DS5MMER), and Ki67 (SolA15) were from eBioscience; Siglec F (E50-2440),  
769 CD90.2 (30-H12), and CD11c (HL3) were from BD Biosciences. Cells were  
770 washed, and if necessary, incubated for 20 more min with fluorochrome-  
771 labeled Streptavidin: Streptavidin-AF647 (Jackson Immunoresearch) or  
772 Streptavidin-APC/cy7, Streptavidin-BV421, Streptavidin-BV605 (BioLegend).  
773 After the last wash, the cells were resuspended in FACS buffer containing  
774 DAPI (BioLegend), Propidium Iodide (Sigma), or DRAQ7 (BioLegend) and  
775 analyzed immediately on an LSR Fortessa flow cytometer running Diva 8

776 software (BD Biosciences). Typically, 500,000 cells were collected from  
777 thymus samples. Data were analyzed using FlowJo software (TreeStar).  
778

779 For intracellular staining, after surface antibody staining, the cells were  
780 labeled with Zombie Aqua (BioLegend) for 30 min in ice. Then, the cells were  
781 fixed with 2% paraformaldehyde (Electron Microscope Sciences) in PBS for  
782 20 min on ice, permeabilized with either 0.5% Triton-X 100 (Sigma) for 20 min  
783 on ice, or with Foxp3 staining kit (eBioscience) according to the protocol  
784 provided by the manufacturer, and stained with antibodies for intracellular  
785 markers for 40-60 min on ice.

786

787 For cell cycle analysis,  $1-5 \times 10^5$  sorted thymic macrophages were fixed with  
788 70% ethanol for 2 h on ice. The cells were spun down at 1800 rpm for 20 min  
789 at 4°C, washed with PBS, and stained with 1 µg/ml DAPI (BioLegend) for 30  
790 min at room temperature in the dark.

791

792 For EdU staining, after surface marker and Zombie Aqua staining, cells  
793 were fixed with 2% paraformaldehyde in PBS for 20 min on ice and  
794 permeabilized with 0.5% Triton X-100 in PBS at room temperature for 20 min.  
795 EdU was detected by adding an equal volume of 2X Click reaction buffer  
796 consisting of 200 mM Tris, 200 mM ascorbic acid (Acros), 8 mM CuSO<sub>4</sub>  
797 (Acros), 8 µM Cy5-azide (Lumiprobe) to the permeabilized cells resuspended  
798 in 0.5% Triton X-100 in PBS and incubation at room temperature for 30 min.  
799 Cells were washed twice with 0.5% Triton X-100 in PBS and analyzed on a  
800 flow cytometer.

801

802 **Cell sorting**

803 The sorting of thymic macrophages was done following the IMMGEN  
804 guidelines. Briefly, the thymuses of 3 male C57BL/6Narl mice were harvested  
805 in ice-cold staining buffer containing phenol red-free DMEM (Gibco) with 10  
806 mM HEPES (Sigma), 0.1% NaN<sub>3</sub>, and 2% FBS (Gibco). Single-cell  
807 suspensions were prepared as described in the Flow cytometry section.  
808 Percoll PLUS was used to enrich mononuclear cells. The cells were  
809 resuspended at 10<sup>8</sup>/mL in staining buffer and labeled with appropriate  
810 antibodies for 15 min in ice. To sort thymic macrophages, the cells were first  
811 labeled with biotinylated antibodies to lineage markers (Lin) – CD3, CD8, Gr1,  
812 B220. After washing, the cells were stained with antibodies to CD11b, F4/80,  
813 CD45, CD64, and Streptavidin-APC/cy7 for 15 min in ice. For sorting thymus  
814 XCR1<sup>+</sup> and SIRP $\alpha$ <sup>+</sup> cDCs, antibodies to XCR1, SIRP $\alpha$ , CD11c, MHC2, CD64,  
815 and F4/80 were used. For sorting peritoneal cavity macrophages, antibodies  
816 to ICAM2 and F4/80 were used. Immediately before sorting, the dead cells  
817 were excluded with DRAQ7 or PI. For RNA Sequencing experiments, the  
818 cells were double-sorted on FACS Melody, or Aria cell sorters (BD  
819 Biosciences) and 1000 cells were directly deposited in TCL buffer (Qiagen),  
820 frozen in dry ice and sent to IMMGEN for RNA sequencing. Four biological  
821 replicates were prepared. For cytopsin and cell cycle analysis, 1-5X10<sup>5</sup> cells  
822 sorted on FACS Melody were collected in staining buffer.

823

824 **Cytospin**

825 Sorted cells were mounted on Superfrost PLUS slides (Thermo Scientific)  
826 using a Cytospin centrifuge (Cytospin 3, Shandon) for 5 min at 500 rpm. Cells  
827 were fixed with 2% paraformaldehyde for 10 min at room temperature and  
828 stained with the Hemacolor Rapid Staining Kit (Merck Millipore). Images were  
829 collected on BX61 upright microscope (Olympus) using 100X objective with  
830 immersion oil and captured with a CCD camera. Images were then analyzed  
831 and processed with ImageJ (NIH) and Adobe Photoshop 5.5 (Adobe).

832

### 833 **RNA sequencing analysis**

834 RNA sequencing was done at IMMGEN using Smart-seq2 protocol[84,85]  
835 on a NextSeq500 sequencer (Illumina). Following sequencing, raw reads  
836 were aligned with STAR to the mouse genome assembly mm10 and assigned  
837 to specific genes using the GENCODE vM12 annotation. Gene expression  
838 was normalized by DESeq2[86] and visualized by Morpheus  
839 (<https://software.broadinstitute.org/morpheus>). Hierarchical clustering was  
840 done with Cluster 3.0 and visualized with Java TreeView. Only genes with  
841  $SD > 20$  were used (10602 genes). The metric used was Pearson correlation  
842 (uncentered), and the clustering method was average linking. Gene  
843 expression of mouse transcription factors[87] was visualized in MultiplotStudio  
844 of GenePattern[88]. GO enrichment was calculated and visualized in R by  
845 using clusterProfiler[89].

846

### 847 **Timed pregnancies and embryonic thymus analysis**

848 To set up timed pregnancies, each male mouse (*Cx3cr1*<sup>CreER/CreER</sup>,  
849 *Cx3cr1*<sup>GFP/GFP</sup> or C57BL/6) and female mouse (*ROSA26*<sup>LSL-GFP/LSL-GFP</sup> or

850 C57BL/6) were housed together in the same cage for one night and separated  
851 on the next day, which we defined as embryonic day 0.5 (E0.5). Female mice  
852 were assumed to be pregnant if their weight gain was over 2 g at E8.5[90].  
853 Thymuses from E14.5 and E17.5 embryos, neonatal, 1-weeks-old pups, and  
854 adult mice (older than 6-weeks-old) were harvested, mechanically dissociated  
855 with plastic sticks in 1.5-mL centrifuge tubes, and enzymatically digested with  
856 0.2 mg/mL DNase I and 0.2 mg/mL collagenase P in complete DMEM for 20  
857 min at 37°C with frequent agitation. The cells were resuspended in PBS with  
858 0.5% BSA, filtered through a 70 µm filter, kept on ice, and used flow  
859 cytometric analysis as described in the Flow Cytometry section.

860

#### 861 **Genetic fate mapping – E9.5, neonatal and adult**

862 For genetic fate mapping, timed pregnancies of *Cx3cr1<sup>CreER/CreER</sup>* male and  
863 *ROSA26<sup>LSL-GFP/LSL-GFP</sup>* female mice were set up as described. To label the  
864 *Cx3cr1<sup>+</sup>* erythromyeloid progenitors derived from embryonic yolk sac[8], 4-  
865 hydroxytamoxifen (4-OHT from Sigma) was administered i.p. to pregnant  
866 females on E9.5 at a dose of 75 µg/g (body weight). To improve the survival  
867 of embryos and reduce the risk of abortions, Progesterone (Sigma) was co-  
868 injected at a dose of 37.5 µg/g (body weight)[91]. To label the *Cx3cr1<sup>+</sup>* thymic  
869 macrophages in *Cx3cr1<sup>CreER</sup>* X *ROSA26<sup>LSL-GFP</sup>* neonates and adult mice,  
870 Tamoxifen (TAM from Sigma) was injected i.p. at a dose of 2 mg/mouse to  
871 lactating dams on postnatal day 3 and 4 (P3 and P4) or to adult mice for 2  
872 consecutive days. Thymuses were harvested and analyzed 3 days or 6  
873 weeks after the last injection by flow cytometry.

874

875 **scRNA-Seq – sorting, library generation, and sequencing**

876 scRNA-Seq was performed at the Genomics Center for Clinical and  
877 Biotechnological Applications of NCFB (NYCU, Taipei, Taiwan). Briefly, the  
878 thymuses of one female MAFIA and 2 male *Cd11c*<sup>YFP</sup> mice were harvested  
879 and enzymatically digested as described previously. Mononuclear cells were  
880 enriched by 57% Percoll PLUS discontinuous centrifugation, washed to  
881 remove silica particles, and resuspended at 10<sup>6</sup>/mL in PBS with 0.04% BSA.  
882 The cell suspensions were filtered through Falcon 35 µm strainer (Corning)  
883 and stained with viability dye (PI or DAPI) immediately before sorting. Cell  
884 sorting was performed on a FACS Melody sorter (BD Biosciences) running  
885 FACS Chorus (BD Biosciences) software in purity mode. 3X10<sup>5</sup> GFP or YFP  
886 positive cells under the live/singlet gating were collected into 5 ml round  
887 bottom tubes pre-coated with 0.04% BSA in PBS. Sorted cells were washed  
888 and resuspended in 300 µL PBS with 0.04% BSA and then filtered again into  
889 1.5-mL DNA LoBind tubes (Eppendorf) through a 35 µm strainer. The viability  
890 of the cells was evaluated by Countess II (Invitrogen) and Trypan Blue  
891 (ThermoFisher), and samples with cell viability rates higher than 85% were  
892 used for encapsulation and library preparation. Single-cell encapsulation and  
893 library preparation were performed using Single Cell 3' v3/v3.1 Gene  
894 Expression solution (10x Genomics). All the libraries were processed  
895 according to the manufacturer's instruction and sequenced on NovaSeq 6000  
896 (Illumina) platform at the NHRI (Zhubei, Taiwan). Post-processing and quality  
897 control were performed by the NYCU Genome Center using the CellRanger  
898 package (v. 3.0.2, 10x Genomics). Reads were aligned to mm10 reference  
899 assembly. Primary assessment with CellRanger reported 9,973 cell-barcodes



900 with 11,385 median unique molecular identifiers (UMIs, transcripts) per cell  
901 and 3,076 median genes per cell sequenced to 71.0% sequencing saturation  
902 with 94,260 mean reads per cell for MAFIA mouse sample; 9,801 cell-  
903 barcodes with 13,467 median UMIs per cell and 3,211 median genes per cell  
904 sequenced to 74.9% sequencing saturation with 119,820 mean reads per cell  
905 for the first *Cd11c<sup>YFP</sup>* mouse sample; 12,938 cell-barcodes with 14,439  
906 median UMIs per cell and 3,199 median genes per cell sequenced to 71.4%  
907 sequencing saturation with 108,585 mean reads per cell for the second  
908 *Cd11c<sup>YFP</sup>* mouse sample.

909

## 910 **Analysis of scRNA-Seq**

### 911 Preprocessing

912 The Scanpy[92] pipeline was used to read the count matrix. Three batches  
913 of samples (one from GFP<sup>+</sup> cells from MAFIA mouse and two from YFP<sup>+</sup> cells  
914 from *Cd11c<sup>YFP</sup>* mice) were preprocessed independently and integrated later.  
915 Cells that expressed <200 genes and genes that were expressed in <3 cells  
916 were filtered out. The percentage of mitochondrial genes was calculated -and  
917 cells with >10% mitochondrial genes were removed. Cells with >7,000 genes  
918 or <1,000 genes were also removed. Read counts were normalized to library  
919 size 10,000 and log-transformed with scanpy.pp.log1p function.

### 920 Datasets integration and batch effect correction

921 Read count matrices and spliced/unspliced matrices were merged first.

922 Principal Component Analysis was applied to reduce dimensions to 70.

923 BBKNN[93] was then used to remove batch effects with the

924 scanpy.external.pp.bbkn function with default parameters.

925 Visualization and clustering

926 UMAP[94] provided by scanpy was used to visualize data with default  
927 parameters. K-nearest neighbor and Leiden clustering were applied  
928 sequentially to cluster cells into groups. K-nearest neighbor graph  
929 construction was done by scanpy.pp.neighbors with parameters  
930 n\_neighbors=12 and n\_pcs=70. Leiden clustering was then performed by  
931 scanpy.tl.leiden with parameter resolution=0.15. To improve UMAP  
932 visualization, scanpy.tl.paga was applied, and we trimmed unnecessary graph  
933 edges by scanpy.tl.paga with threshold=0.018.

934 Marker genes and statistics

935 Wilcoxon rank-sum tests were applied to examine differentially expressed  
936 genes. Clusters were selected from the result of Leiden clustering.  
937 Differentially expressed genes of a cluster against other clusters were  
938 identified by scanpy.tl.rank\_genes\_groups and scanpy.pl.rank\_genes\_groups.  
939 P-values were collected for each cluster and transformed by negative log<sub>10</sub> for  
940 better visualization. The top 50 differentially expressed genes were visualized  
941 in the figure.

942

943 **Immunofluorescent staining**

944 Dissected thymus lobes from C57BL/6 mice were cleaned of connective  
945 tissue and fixed in 4% paraformaldehyde (Sigma) for 1 h at 4°C, washed in  
946 PBS, submerged in 10% sucrose, and then in 30% sucrose for 12 h each.  
947 The tissue was then frozen in Tissue-Tek OCT compound (Sakura Fintek) for  
948 cryostat sectioning. 10 or 20 µm thick sections were prepared with CryoStar  
949 NX50 (ThermoFisher) on Superfrost PLUS (ThermoScientific) microscope

950 slides, dried overnight, and stored at -80°C until used. Before staining, the  
951 sections were fixed with acetone (Sigma) at -20°C for 10 min, air-dried, then  
952 blocked with 5% goat serum + 5% donkey serum (both from Jackson  
953 Immunoresearch) in PBS for 2 h and stained with primary antibodies: rat  
954 monoclonal to MerTK (DS5MMER, eBioscience), rat monoclonal to TIM4  
955 (RMT4-54, Bio-X-Cell) or rabbit polyclonal to Keratin 5 (BioLegend) overnight  
956 at 4°C in a humidified chamber. After washing in PBS, the sections were  
957 labeled with goat anti-rat-Alexa Fluor 647 (Invitrogen) or goat anti-rat Cy3  
958 (Jackson Immunoresearch) and donkey anti-rabbit AF647 (Jackson  
959 Immunoresearch) secondary antibodies for 2 hours at room temperature,  
960 followed by 5 min staining with DAPI. TUNEL Assay was done with the Click-  
961 iT Plus TUNEL Assay Alexa Fluor 647 kit (Invitrogen) according to the  
962 manufacturer's recommendations. A positive (pre-incubation with DNase I for  
963 30 min at room temperature) and negative (no TdT enzyme) controls were  
964 always included. The sections were mounted with 0.1% n-propyl gallate  
965 (Sigma) in glycerol (Sigma) and imaged with an AxioObserver 7 (Carl Zeiss)  
966 wide-field microscope equipped with Plan Aplanachromat 20x NA=0.8 objective  
967 (Zeiss) and AxioCam 702 mono camera (Zeiss) and controlled by Zen 2.3  
968 Blue (Zeiss) software. Image analysis was performed with Imaris 8.0.2  
969 (Bitplane).

970

971 The co-localization scoring for MerTK and TIM4 with TUNEL was done with  
972 Imaris 8.2 (Bitplane). TUNEL<sup>+</sup> cells were detected with the Spots function,  
973 while MerTK<sup>+</sup> and TIM4<sup>+</sup> cells were detected with the Surface function. Spots  
974 that co-localize with Surfaces were identified with the "Find Spots close to

975 Surface” function of Imaris XT. The threshold for co-localization was set to 5  
976  $\mu\text{m}$ . The results were manually curated so that Spots categorized as “not co-  
977 localized” that were: 1) at the edge of the imaging field were excluded from  
978 consideration; 2) with clear Surface signal around them were re-categorized  
979 as “co-localized”. The ratio of co-localized Spots to all Spots was calculated  
980 and presented as the co-localization index.

981

### 982 **Thymus transplantation**

983 To obtain E15.5 embryos, *ROSA26<sup>GFP</sup>* homozygous male and C57BL/6  
984 female mice were mated in a cage overnight and separated on the next day.  
985 Pregnant mice were sacrificed 15 days later, the viable embryos were  
986 harvested, and the thymuses were isolated in ice-cold PBS. C57BL/6  
987 recipients were anesthetized by i.p injection of Ketamine hydrochloride (120  
988  $\mu\text{g/g}$ , Toronto Research Chemicals) and Xylazine hydrochloride (12  $\mu\text{g/g}$ ,  
989 Sigma). The fur on the left flank was removed, and the left kidney was  
990 exposed by cutting the skin, muscle layer, and peritoneum. The kidney  
991 capsule was nicked with a G23 needle, and the fetal thymus was pushed into  
992 the pocket under the kidney capsule with a G23 needle equipped with a  
993 plunger from a spinal needle. After the kidney was re-positioned back into the  
994 peritoneal cavity, the peritoneum was sutured, and the skin was stapled with  
995 metal clips. Rymadil (Carprofen, 5  $\mu\text{g/g}$ , Zoetis) was given subcutaneously to  
996 ease the wound pain, and Trimerin (Sulfadiazine at 0.5 mg/mL + Trimethoprim  
997 at 0.1 mg/mL) were given in the drinking water for the first two weeks after the  
998 surgery. The metal clips were removed from the skin after the first week, and

999 the transplanted thymus and recipient's endogenous thymus were harvested  
1000 and analyzed six weeks after the kidney transplantation.

1001

### 1002 **Statistical analysis**

1003 Comparison between groups was made with Prism 6 (GraphPad Software).  
1004 Comparisons between two groups were carried out with unpaired Student's t-  
1005 test. When more than two groups were compared, a one-way ANOVA with  
1006 Tukey correction was used. Differences were considered significant if  $p < 0.05$ .

1007

### 1008 **Data availability**

1009 The RNA Sequencing data of thymic macrophages and thymic dendritic  
1010 cells is available at NCBI Gene Expression Omnibus (GEO) as part of  
1011 GSE122108 and at [www.immgen.org](http://www.immgen.org). The single cell RNA sequencing data is  
1012 deposited at NCBI GEO under accession number GSE185460. The source  
1013 data underlying Fig. 1g-h, Fig. 3c, f, i, Fig. 4b, f, h, Fig. 6b, d, Fig. 7b, d, e, Fig.  
1014 S1h, Fig. S3c, and Fig. S4b, d, e, g are provided in the Source Data files. All  
1015 other data supporting the findings of this study are available within the article  
1016 and its figures and tables.

1017

### 1018 **Abbreviations:**

1019 cDC – classical dendritic cell  
1020 DC – dendritic cell  
1021 EdU – 5-Ethynyl-2'-deoxyuridine  
1022 GO – gene ontology  
1023 HSC – hematopoietic stem cell

- 1024 IFN-I – type I Interferon
- 1025 IMMGEN – Immunological Genome Consortium
- 1026 scRNA-Seq – single-cell RNA sequencing
- 1027 TF – transcription factor
- 1028 ThyMacs – thymic macrophages
- 1029 TRA – tissue-restricted antigen
- 1030 YS – yolk sac

1031 **References:**

- 1032 1. Wynn TA, Chawla A, Pollard JW. Macrophage biology in development,  
1033 homeostasis and disease. *Nature*. Nature Publishing Group; 2013;496:  
1034 445–455. doi:10.1038/nature12034
- 1035 2. Baratin M, Simon L, Jorquera A, Ghigo C, Dembele D, Nowak J, et al. T  
1036 Cell Zone Resident Macrophages Silently Dispose of Apoptotic Cells in  
1037 the Lymph Node. *Immunity*. Elsevier Inc; 2017;47: 349–362.e5.  
1038 doi:10.1016/j.immuni.2017.07.019
- 1039 3. A-Gonzalez N, Castrillo A. Origin and Specialization of Splenic  
1040 Macrophages. *Cellular Immunology*. 2018;330: 1–27.  
1041 doi:10.1016/j.cellimm.2018.05.005
- 1042 4. Bellomo A, Mondor I, Spinelli L, Lagueyrie M, Stewart BJ, Brouilly N, et  
1043 al. Reticular Fibroblasts Expressing the Transcription Factor WT1  
1044 Define a Stromal Niche that Maintains and Replenishes Splenic Red  
1045 Pulp Macrophages. *Immunity*. Elsevier Inc; 2020;53: 127–142.e7.  
1046 doi:10.1016/j.immuni.2020.06.008
- 1047 5. van Furth R, Cohn ZA. The origin and kinetics of mononuclear  
1048 phagocytes. *J Exp Med*. Rockefeller University Press; 1968;128: 415–  
1049 435. doi:10.1084/jem.128.3.415
- 1050 6. Ginhoux F, Guilliams M. Tissue-Resident Macrophage Ontogeny and  
1051 Homeostasis. *Immunity*. 2016;44: 439–449.  
1052 doi:10.1016/j.immuni.2016.02.024
- 1053 7. Perdiguero EG, Klapproth K, Schulz C, Busch K, Azzoni E, Crozet L, et  
1054 al. Tissue-resident macrophages originate from yolk-sac-derived  
1055 erythro-myeloid progenitors. *Nat Immunol*. Nature Publishing Group;  
1056 2015;518: 547–551. doi:10.1038/nature13989
- 1057 8. Mass E, Ballesteros I, Farlik M, Halbritter F, Günther P, Crozet L, et al.

- 1058 Specification of tissue-resident macrophages during organogenesis.  
1059 Science. American Association for the Advancement of Science;  
1060 2016;353: aaf4238–aaf4238. doi:10.1126/science.aaf4238
- 1061 9. Ginhoux F, Greter M, Leboeuf M, Nandi S, See P, Gokhan S, et al. Fate  
1062 mapping analysis reveals that adult microglia derive from primitive  
1063 macrophages. Science. 2010;330: 841–845.  
1064 doi:10.1126/science.1194637
- 1065 10. Hoeffel G, Wang Y, Greter M, See P, Teo P, Malleret B, et al. Adult  
1066 Langerhans cells derive predominantly from embryonic fetal liver  
1067 monocytes with a minor contribution of yolk sac–derived macrophages.  
1068 J Exp Med. 2012;209: 1167–1181. doi:10.1084/jem.20120340
- 1069 11. Hoeffel G, Chen J, Lavin Y, Low D, Almeida FF, See P, et al. C-Myb(+)  
1070 erythro-myeloid progenitor-derived fetal monocytes give rise to adult  
1071 tissue-resident macrophages. Immunity. 2015;42: 665–678.  
1072 doi:10.1016/j.immuni.2015.03.011
- 1073 12. Goldmann T, Wieghofer P, Jordão MJC, Prutek F, Hagemeyer N,  
1074 Frenzel K, et al. Origin, fate and dynamics of macrophages at central  
1075 nervous system interfaces. Nat Immunol. 2016;17: 797–805.  
1076 doi:10.1038/ni.3423
- 1077 13. Hashimoto D, Chow A, Noizat C, Teo P, Beasley MB, Leboeuf M, et al.  
1078 Tissue-Resident Macrophages Self-Maintain Locally throughout Adult  
1079 Life with Minimal Contribution from Circulating Monocytes. Immunity.  
1080 Elsevier Inc; 2013;38: 792–804. doi:10.1016/j.immuni.2013.04.004
- 1081 14. Epelman S, Lavine KJ, Beaudin AE, Sojka DK, Carrero JA, Calderon B,  
1082 et al. Embryonic and Adult-Derived Resident Cardiac Macrophages Are  
1083 Maintained through Distinct Mechanisms at Steady State and during  
1084 Inflammation. Immunity. Elsevier Inc; 2014;40: 91–104.  
1085 doi:10.1016/j.immuni.2013.11.019
- 1086 15. Sheng J, Ruedl C, Karjalainen K. Most Tissue-Resident Macrophages  
1087 Except Microglia Are Derived from Fetal Hematopoietic Stem Cells.  
1088 Immunity. Elsevier Inc; 2015;43: 382–393.  
1089 doi:10.1016/j.immuni.2015.07.016
- 1090 16. Liu Z, Gu Y, Chakarov S, Bleriot C, Kwok I, Chen X, et al. Fate Mapping  
1091 via Ms4a3-Expression History Traces Monocyte-Derived Cells. Cell.  
1092 Elsevier; 2019;178: 1509–1525.e19. doi:10.1016/j.cell.2019.08.009
- 1093 17. Ensan S, Li A, Besla R, Degousee N, Cosme J, Roufaiel M, et al. Self-  
1094 renewing resident arterial macrophages arise from embryonic  
1095 CX3CR1+ precursors and circulating monocytes immediately after birth.  
1096 Nat Immunol. Nature Publishing Group; 2015;17: 159–168.  
1097 doi:10.1038/ni.3343
- 1098 18. Mondor I, Baratin M, Lagueyrie M, Saro L, Henri S, Gentek R, et al.



- 1099 Lymphatic Endothelial Cells Are Essential Components of the  
1100 Subcapsular Sinus Macrophage Niche. *Immunity*. Elsevier Inc; 2019;50:  
1101 1453–1466.e4. doi:10.1016/j.immuni.2019.04.002
- 1102 19. Molawi K, Wolf Y, Kandalla PK, Favret J, Hagemeyer N, Frenzel K, et  
1103 al. Progressive replacement of embryo-derived cardiac macrophages  
1104 with age. *J Exp Med*. 2014;211: 2151–2158. doi:10.1084/jem.20140639
- 1105 20. Heidt T, Courties G, Dutta P, Sager HB, Sebas M, Iwamoto Y, et al.  
1106 Differential Contribution of Monocytes to Heart Macrophages in Steady-  
1107 State and After Myocardial Infarction. *Circulation Research*. 2014;115:  
1108 284–295. doi:10.1161/CIRCRESAHA.115.303567
- 1109 21. Yahara Y, Barrientos T, Tang YJ, Puvindran V, Nadesan P, Zhang H,  
1110 et al. Erythromyeloid progenitors give rise to a population of osteoclasts  
1111 that contribute to bone homeostasis and repair. *Nat Cell Biol*. Springer  
1112 US; 2020;22: 1–28. doi:10.1038/s41556-019-0437-8
- 1113 22. Jacome-Galarza CE, Percin GI, Muller JT, Mass E, Lazarov T, Eitler J,  
1114 et al. Developmental origin, functional maintenance and genetic rescue  
1115 of osteoclasts. *Nature*. Nature Publishing Group; 2019;568: 541–545.  
1116 doi:10.1038/s41586-019-1105-7
- 1117 23. Calderon B, Carrero JA, Ferris ST, Sojka DK, Moore L, Epelman S, et  
1118 al. The pancreas anatomy conditions the origin and properties of  
1119 resident macrophages. *J Exp Med*. 2015;212: 1497–1512.  
1120 doi:10.1084/jem.20150496
- 1121 24. Tamoutounour S, Guilliams M, Sanchis FM, Liu H, Terhorst D, Malosse  
1122 C, et al. Origins and Functional Specialization of Macrophages and of  
1123 Conventional and Monocyte-Derived Dendritic Cells in Mouse Skin.  
1124 *Immunity*. Elsevier Inc; 2013;39: 925–938.  
1125 doi:10.1016/j.immuni.2013.10.004
- 1126 25. Bain CC, Bravo-Blas A, Scott CL, Gomez Perdiguero E, Geissmann F,  
1127 Henri S, et al. Constant replenishment from circulating monocytes  
1128 maintains the macrophage pool in the intestine of adult mice. *Nat*  
1129 *Immunol*. 2014;15: 929–937. doi:10.1038/ni.2967
- 1130 26. Siervo F, Evrard M, Rizzetto S, Melino M, Mitchell AJ, Florido M, et al. A  
1131 Liver Capsular Network of Monocyte-Derived Macrophages Restricts  
1132 Hepatic Dissemination of Intraperitoneal Bacteria by Neutrophil  
1133 Recruitment. *Immunity*. Elsevier Inc; 2017;47: 374–388.e6.  
1134 doi:10.1016/j.immuni.2017.07.018
- 1135 27. Mossadegh-Keller N, Gentek R, Gimenez G, Bigot S, Mailfert S,  
1136 Sieweke MH. Developmental origin and maintenance of distinct  
1137 testicular macrophage populations. *J Exp Med*. 2017;214: 2829–2841.  
1138 doi:10.1084/jem.20170829
- 1139 28. Lokka E, Lintukorpi L, Cisneros-Montalvo S, Mäkelä J-A, Tyystjärvi S,

- 1140 Ojasalo V, et al. Generation, localization and functions of macrophages  
1141 during the development of testis. *Nature Communications*. Springer US;  
1142 2020;11: 1–16. doi:10.1038/s41467-020-18206-0
- 1143 29. Wang M, Yang Y, Cansever D, Wang Y, Kantores C, Messiaen S, et al.  
1144 Two populations of self-maintaining monocyte-independent  
1145 macrophages exist in adult epididymis and testis. *PNAS*. 2020;118:  
1146 e2013686117. doi:10.1073/pnas.2013686117/-/DCSupplemental
- 1147 30. Bain CC, Hawley CA, Garner H, Scott CL, Schridde A, Steers NJ, et al.  
1148 Long-lived self-renewing bone marrow-derived macrophages displace  
1149 embryo-derived cells to inhabit adult serous cavities. *Nature*  
1150 *Communications*. Nature Publishing Group; 2016;7: 1–14.  
1151 doi:10.1038/ncomms11852
- 1152 31. Surh CD, Sprent J. T-cell apoptosis detected in situ during positive and  
1153 negative selection in the thymus. *Nature*. 1994;372: 100–103.  
1154 doi:10.1038/372100a0
- 1155 32. Esashi E, Sekiguchi T, Ito H, Koyasu S, Miyajima A. Cutting Edge: A  
1156 possible role for CD4+ thymic macrophages as professional scavengers  
1157 of apoptotic thymocytes. *Journal of Immunology (Baltimore, Md : 1950)*.  
1158 *American Association of Immunologists*; 2003;171: 2773–2777.  
1159 doi:10.4049/jimmunol.171.6.2773
- 1160 33. Liu L-T, Lang Z-F, Li Y, Zhu Y-J, Zhang J-T, Guo S-F, et al.  
1161 Composition and characteristics of distinct macrophage subpopulations  
1162 in the mouse thymus. *Molecular Medicine Reports*. 2013;7: 1850–1854.  
1163 doi:10.3892/mmr.2013.1448
- 1164 34. Guerri L, Peguillet I, Geraldo Y, Nabti S, Premel V, Lantz O. Analysis of  
1165 APC types involved in CD4 tolerance and regulatory T cell generation  
1166 using reaggregated thymic organ cultures. *J Immunol. American*  
1167 *Association of Immunologists*; 2013;190: 2102–2110.  
1168 doi:10.4049/jimmunol.1202883
- 1169 35. Lopes N, Charaix J, Cédile O, Sergé A, Irla M. Lymphotoxin alpha fine-  
1170 tunes T cell clonal deletion by regulating thymic entry of antigen-  
1171 presenting cells. *Nature Communications*. Springer US; 2018;9: 1–16.  
1172 doi:10.1038/s41467-018-03619-9
- 1173 36. Kim H-J, Alonzo ES, Dorothee G, Pollard JW, Sant'Angelo DB.  
1174 Selective depletion of eosinophils or neutrophils in mice impacts the  
1175 efficiency of apoptotic cell clearance in the thymus. Kim H-J, Alonzo ES,  
1176 Dorothee G, Pollard JW, Sant'Angelo DB, editors. *PLoS ONE*. 2010;5:  
1177 e11439. doi:10.1371/journal.pone.0011439.g010
- 1178 37. Tacke R, Hilgendorf I, Garner H, Waterborg C, Park K, Nowyhed H, et  
1179 al. The transcription factor NR4A1 is essential for the development of a  
1180 novel macrophage subset in the thymus. *Sci Rep*. 2015;5: 10055.  
1181 doi:10.1038/srep10055

- 1182 38. Gautier EL, Shay T, Miller J, Greter M, Jakubzick C, Ivanov S, et al.  
1183 Gene-expression profiles and transcriptional regulatory pathways that  
1184 underlie the identity and diversity of mouse tissue macrophages. *Nat*  
1185 *Immunol.* 2012;13: 1118–1128. doi:10.1038/ni.2419
- 1186 39. Ingersoll MA, Spanbroek R, Lottaz C, Gautier EL, Frankenberger M,  
1187 Hoffmann R, et al. Comparison of gene expression profiles between  
1188 human and mouse monocyte subsets. *Blood.* 2010;115: e10–e19.  
1189 doi:10.1182/blood-2009-07-235028
- 1190 40. Wang H, Breed ER, Lee YJ, Qian LJ, Jameson SC, Hogquist KA.  
1191 Myeloid cells activate iNKT cells to produce IL-4 in the thymic medulla.  
1192 *Proc Natl Acad Sci. National Academy of Sciences;* 2019;116: 22262–  
1193 22268. doi:10.1073/pnas.1910412116
- 1194 41. Chan CT, Fenn AM, Harder NK, Mindur JE, McAlpine CS, Patel J, et al.  
1195 Liver X receptors are required for thymic resilience and T cell output. *J*  
1196 *Exp Med.* 2020;217: 245–23. doi:10.1084/jem.20200318
- 1197 42. Wada H, Masuda K, Satoh R, Kakugawa K, Ikawa T, Katsura Y, et al.  
1198 Adult T-cell progenitors retain myeloid potential. *Nature. Nature*  
1199 *Publishing Group;* 2008;452: 768–772. doi:10.1038/nature06839
- 1200 43. Bell JJ, Bhandoola A. The earliest thymic progenitors for T cells  
1201 possess myeloid lineage potential. *Nature.* 2008;452: 764–767.  
1202 doi:10.1038/nature06840
- 1203 44. Schlenner SM, Madan V, Busch K, Tietz A, LAufle C, Costa C, et al.  
1204 Fate Mapping Reveals Separate Origins of T Cells and Myeloid  
1205 Lineages in the Thymus. *Immunity. Elsevier Ltd;* 2010;32: 426–436.  
1206 doi:10.1016/j.immuni.2010.03.005
- 1207 45. Witmer-Pack MD, Hughes DA, Schuler G, Lawson L, McWilliam A,  
1208 Inaba K, et al. Identification of macrophages and dendritic cells in the  
1209 osteopetrotic (op/op) mouse. *J Cell Sci.* 1993;104 ( Pt 4): 1021–1029.
- 1210 46. Sasmono RT, Oceandy D, Pollard JW, Tong W, Pavli P, Wainwright BJ,  
1211 et al. A macrophage colony-stimulating factor receptor-green  
1212 fluorescent protein transgene is expressed throughout the mononuclear  
1213 phagocyte system of the mouse. *Blood. American Society of*  
1214 *Hematology;* 2003;101: 1155–1163. doi:10.1182/blood-2002-02-0569
- 1215 47. Hume DA. Applications of myeloid-specific promoters in transgenic mice  
1216 support in vivo imaging and functional genomics but do not support the  
1217 concept of distinct macrophage and dendritic cell lineages or roles in  
1218 immunity. *Journal of Leukocyte Biology.* 2011;89: 525–538.  
1219 doi:10.1189/jlb.0810472
- 1220 48. Taniuchi I, Osato M, Egawa T, Sunshine MJ, Bae SC, Komori T, et al.  
1221 Differential requirements for Runx proteins in CD4 repression and  
1222 epigenetic silencing during T lymphocyte development. *Cell.* 2002;111:

- 1223 621–633. doi:10.1016/s0092-8674(02)01111-x
- 1224 49. Ebihara T, Song C, Ryu SH, Plougastel-Douglas B, Yang L, Levanon D,  
1225 et al. Runx3 specifies lineage commitment of innate lymphoid cells. *Nat*  
1226 *Immunol.* Nature Publishing Group; 2015;16: 1124–1133.  
1227 doi:10.1038/ni.3272
- 1228 50. Fainaru O, Woolf E, Lotem J, Yarmus M, Brenner O, Goldenberg D, et  
1229 al. Runx3 regulates mouse TGF-beta-mediated dendritic cell function  
1230 and its absence results in airway inflammation. *EMBO J.* John Wiley &  
1231 Sons, Ltd; 2004;23: 969–979. doi:10.1038/sj.emboj.7600085
- 1232 51. Kohyama M, Ise W, Edelson BT, Wilker PR, Hildner K, Mejia C, et al.  
1233 Role for Spi-C in the development of red pulp macrophages and splenic  
1234 iron homeostasis. *Nat Immunol.* Nature Publishing Group; 2008;457:  
1235 318–321. doi:10.1038/nature07472
- 1236 52. Haldar M, Kohyama M, So AY-L, KC W, Wu X, Briseño CG, et al.  
1237 Heme-Mediated SPI-C Induction Promotes Monocyte Differentiation into  
1238 Iron-Recycling Macrophages. *Cell.* Elsevier Inc; 2014;156: 1223–1234.  
1239 doi:10.1016/j.cell.2014.01.069
- 1240 53. Yona S, Kim K-W, Wolf Y, Mildner A, Varol D, Breker M, et al. Fate  
1241 Mapping Reveals Origins and Dynamics of Monocytes and Tissue  
1242 Macrophages under Homeostasis. *Immunity.* Elsevier; 2013;38: 79–91.  
1243 doi:10.1016/j.immuni.2012.12.001
- 1244 54. McCaughy TM, Wilken MS, Hogquist KA. Thymic emigration revisited.  
1245 *J Exp Med.* 2007;204: 2513–2520. doi:10.1084/jem.20070601
- 1246 55. Lienenklaus S, Cornitescu M, Ziętara N, Łyszkiewicz M, Gekara N,  
1247 Jabłńska J, et al. Novel reporter mouse reveals constitutive and  
1248 inflammatory expression of IFN-beta in vivo. *J Immunol.* American  
1249 Association of Immunologists; 2009;183: 3229–3236.  
1250 doi:10.4049/jimmunol.0804277
- 1251 56. Otero DC, Baker DP, David M. IRF7-dependent IFN- $\beta$  production in  
1252 response to RANKL promotes medullary thymic epithelial cell  
1253 development. *J Immunol.* American Association of Immunologists;  
1254 2013;190: 3289–3298. doi:10.4049/jimmunol.1203086
- 1255 57. Breed ER, Lee ST, Hogquist KA. Directing T cell fate: How thymic  
1256 antigen presenting cells coordinate thymocyte selection. *Seminars in*  
1257 *Cell and Developmental Biology.* Elsevier Ltd; 2017;; 1–9.  
1258 doi:10.1016/j.semcd.2017.07.045
- 1259 58. Kurd NS, Lutes LK, Yoon J, Chan SW, Dzhagalov IL, Hoover AR, et al.  
1260 A role for phagocytosis in inducing cell death during thymocyte negative  
1261 selection. *eLife.* 2019;8: 1879–18. doi:10.7554/eLife.48097
- 1262 59. Morioka S, Perry JSA, Raymond MH, Medina CB, Zhu Y, Zhao L, et al.  
1263 Efferocytosis induces a novel SLC program to promote glucose uptake

- 1264 and lactate release. *Nature*. Springer US; 2018;563: 1–21.  
1265 doi:10.1038/s41586-018-0735-5
- 1266 60. Bleriot C, Chakarov S, Ginhoux F. Determinants of Resident Tissue  
1267 Macrophage Identity and Function. *Immunity*. Elsevier Inc; 2020;52:  
1268 957–970. doi:10.1016/j.immuni.2020.05.014
- 1269 61. Stritesky GL, Xing Y, Erickson JR, Kalekar LA, Wang X, Mueller DL, et  
1270 al. Murine thymic selection quantified using a unique method to capture  
1271 deleted T cells. *Proc Natl Acad Sci*. 2013;110: 4679–4684.  
1272 doi:10.1073/pnas.1217532110
- 1273 62. Baba T, Nakamoto Y, Mukaida N. Crucial Contribution of Thymic Sirp +  
1274 Conventional Dendritic Cells to Central Tolerance against Blood-Borne  
1275 Antigens in a CCR2-Dependent Manner. *J Immunol*. 2009;183: 3053–  
1276 3063. doi:10.4049/jimmunol.0900438
- 1277 63. Gallegos AM, Bevan MJ. Central Tolerance to Tissue-specific Antigens  
1278 Mediated by Direct and Indirect Antigen Presentation. *J Exp Med*.  
1279 2004;200: 1039–1049. doi:10.1084/jem.20041457
- 1280 64. Koble C, Kyewski B. The thymic medulla: a unique microenvironment  
1281 for intercellular self-antigen transfer. *J Exp Med*. 2009;206: 1505–1513.  
1282 doi:10.1084/jem.20082449
- 1283 65. Vobořil M, Brabec T, Dobeř J, Šplíchalová I, Březina J, Čepková A, et  
1284 al. Toll-like receptor signaling in thymic epithelium controls monocyte-  
1285 derived dendritic cell recruitment and Treg generation. *Nature*  
1286 *Communications*. Springer US; 2020;11: 1–16. doi:10.1038/s41467-  
1287 020-16081-3
- 1288 66. Dixit VD. Impact of immune-metabolic interactions on age-related  
1289 thymic demise and T cell senescence. *Semin Immunol*. Elsevier Ltd;  
1290 2012;24: 321–330. doi:10.1016/j.smim.2012.04.002
- 1291 67. Rivera-Gonzalez GC, Shook BA, Andrae J, Holtrup B, Bollag K,  
1292 Betsholtz C, et al. Skin Adipocyte Stem Cell Self-Renewal Is Regulated  
1293 by a PDGFA/AKT-Signaling Axis. *Stem Cell*. Elsevier Inc; 2016;19:  
1294 738–751. doi:10.1016/j.stem.2016.09.002
- 1295 68. Olson LE, Soriano P. Increased PDGFR $\alpha$  Activation Disrupts  
1296 Connective Tissue Development and Drives Systemic Fibrosis.  
1297 *Developmental Cell*. Elsevier Ltd; 2009;16: 303–313.  
1298 doi:10.1016/j.devcel.2008.12.003
- 1299 69. Satpathy AT, KC W, Albring JC, Edelson BT, Kretzer NM, Bhattacharya  
1300 D, et al. Zbtb46 expression distinguishes classical dendritic cells and  
1301 their committed progenitors from other immune lineages. *J Exp Med*.  
1302 2012;209: 1135–1152. doi:10.1084/jem.20120030
- 1303 70. Guilliams M, Mildner A, Yona S. Developmental and Functional  
1304 Heterogeneity of Monocytes. *Immunity*. Elsevier Inc; 2018;49: 595–613.



- 1305            doi:10.1016/j.immuni.2018.10.005
- 1306    71.    Tabula Muris Consortium. Single-cell transcriptomics of 20 mouse  
1307            organs creates a Tabula Muris. *Nature*. Nature Publishing Group;  
1308            2018;562: 367–372. doi:10.1038/s41586-018-0590-4
- 1309    72.    Han X, Wang R, Zhou Y, Fei L, Sun H, Lai S, et al. Mapping the Mouse  
1310            Cell Atlas by Microwell-Seq. *Cell*. Elsevier Inc; 2018;172: 1091–  
1311            1097.e17. doi:10.1016/j.cell.2018.02.001
- 1312    73.    Tabula Muris Consortium. A single-cell transcriptomic atlas  
1313            characterizes ageing tissues in the mouse. *Nature*. Nature Publishing  
1314            Group; 2020;583: 590–595. doi:10.1038/s41586-020-2496-1
- 1315    74.    Kernfeld EM, Genga RMJ, Neherin K, Magaletta ME, Xu P, Maehr R. A  
1316            Single-Cell Transcriptomic Atlas of Thymus Organogenesis Resolves  
1317            Cell Types and Developmental Maturation. *Immunity*. Elsevier Inc;  
1318            2018;: 1–33. doi:10.1016/j.immuni.2018.04.015
- 1319    75.    Park J-E, Botting RA, Domínguez Conde C, Popescu D-M, Lavaert M,  
1320            Kunz DJ, et al. A cell atlas of human thymic development defines T cell  
1321            repertoire formation. *Science*. American Association for the  
1322            Advancement of Science; 2020;367: eaay3224–12.  
1323            doi:10.1126/science.aay3224
- 1324    76.    Bornstein C, Nevo S, Giladi A, Kadouri N, Pouzolles M, Gerbe F, et al.  
1325            Single-cell mapping of the thymic stroma identifies IL-25-producing tuft  
1326            epithelial cells. *Nature*. Springer US; 2018;559: 1–25.  
1327            doi:10.1038/s41586-018-0346-1
- 1328    77.    Bautista JL, Cramer NT, Miller CN, Chavez J, Berrios DI, Byrnes LE, et  
1329            al. Single-cell transcriptional profiling of human thymic stroma uncovers  
1330            novel cellular heterogeneity in the thymic medulla. *Nature*  
1331            Communications. Nature Publishing Group; 2021;12: 1096–15.  
1332            doi:10.1038/s41467-021-21346-6
- 1333    78.    Burnett SH, Kershner EJ, Zhang J, Zeng L, Straley SC, Kaplan AM, et  
1334            al. Conditional macrophage ablation in transgenic mice expressing a  
1335            Fas-based suicide gene. *Journal of Leukocyte Biology*. Society for  
1336            Leukocyte Biology; 2004;75: 612–623. doi:10.1189/jlb.0903442
- 1337    79.    Jung S, Aliberti J, Graemmel P, Sunshine MJ, Kreutzberg GW, Sher A,  
1338            et al. Analysis of fractalkine receptor CX(3)CR1 function by targeted  
1339            deletion and green fluorescent protein reporter gene insertion. *Mol Cell*  
1340            Biol. 2000;20: 4106–4114.
- 1341    80.    Lindquist RL, Shakhar G, Dudziak D, Wardemann H, Eisenreich T,  
1342            Dustin ML, et al. Visualizing dendritic cell networks in vivo. *Nat*  
1343            Immunol. 2004;5: 1243–1250. doi:10.1038/ni1139
- 1344    81.    Faust N, Varas F, Kelly LM, Heck S, Graf T. Insertion of enhanced  
1345            green fluorescent protein into the lysozyme gene creates mice with

- 1346 green fluorescent granulocytes and macrophages. *Blood*. 2000;96:  
1347 719–726.
- 1348 82. Roesch K, Jadhav AP, Trimarchi JM, Stadler MB, Roska B, Sun BB, et  
1349 al. The transcriptome of retinal Müller glial cells. *J Comp Neurol*.  
1350 2008;509: 225–238. doi:10.1002/cne.21730
- 1351 83. Madisen L, Zwingman TA, Sunkin SM, Oh SW, Zariwala HA, Gu H, et  
1352 al. A robust and high-throughput Cre reporting and characterization  
1353 system for the whole mouse brain. *Nature Neuroscience*. Nature  
1354 Publishing Group; 2009;13: 133–140. doi:10.1038/nn.2467
- 1355 84. Picelli S, Faridani OR, rklund ASKBO, Winberg GOS, Sagasser S,  
1356 Sandberg R. Full-length RNA-seq from single cells using Smart-seq2.  
1357 *Nature Protocols*. Nature Publishing Group; 2014;9: 171–181.  
1358 doi:10.1038/nprot.2014.006
- 1359 85. Picelli S, Björklund ÅK, Faridani OR, Sagasser S, Winberg G, Sandberg  
1360 R. Smart-seq2 for sensitive full-length transcriptome profiling in single  
1361 cells. *Nat Meth*. 2013;10: 1096–1098. doi:10.1038/nmeth.2639
- 1362 86. Love MI, Huber W, Anders S. Moderated estimation of fold change and  
1363 dispersion for RNA-seq data with DESeq2. *Genome Biol. BioMed*  
1364 *Central*; 2014;15: 31–21. doi:10.1186/s13059-014-0550-8
- 1365 87. Schmeier S, Alam T, Essack M, Bajic VB. TcoF-DB v2: update of the  
1366 database of human and mouse transcription co-factors and transcription  
1367 factor interactions. *Nucleic Acids Res*. 2017;45: D145–D150.  
1368 doi:10.1093/nar/gkw1007
- 1369 88. Reich M, Liefeld T, Gould J, Lerner J, Tamayo P, Mesirov JP.  
1370 GenePattern 2.0. *Nat Genet*. Nature Publishing Group; 2006;38: 500–  
1371 501. doi:10.1038/ng0506-500
- 1372 89. Yu G, Wang L-G, Han Y, He Q-Y. clusterProfiler: an R Package for  
1373 Comparing Biological Themes Among Gene Clusters. *OMICS: A*  
1374 *Journal of Integrative Biology*. Mary Ann Liebert, Inc., publishers;  
1375 2012;16: 284–287. doi:10.1089/omi.2011.0118
- 1376 90. Heyne GW, Plisch EH, Melberg CG, Sandgren EP, Peter JA, Lipinski  
1377 RJ. A Simple and Reliable Method for Early Pregnancy Detection in  
1378 Inbred Mice. *J Am Assoc Lab Anim Sci*. 2015;54: 368–371.
- 1379 91. Iturri L, Saenz Coronilla J, Lallemand Y, Gomez Perdiguero E.  
1380 Identification Of Erythromyeloid Progenitors And Their Progeny In The  
1381 Mouse Embryo By Flow Cytometry. *JoVE*. 2017;: 1–10.  
1382 doi:10.3791/55305
- 1383 92. Wolf FA, Angerer P, Theis FJ. SCANPY: large-scale single-cell gene  
1384 expression data analysis. *Genome Biol. BioMed Central*; 2018;19: 15–  
1385 5. doi:10.1186/s13059-017-1382-0

- 1386 93. Polański K, Young MD, Miao Z, Meyer KB, Teichmann SA, Park J-E.  
1387 BBKNN: fast batch alignment of single cell transcriptomes.  
1388 Bioinformatics. 2019;36: 964–965.  
1389 doi:10.1093/bioinformatics/btz625#supplementary-data
- 1390 94. McInnes L, Healy J, Melville J. UMAP: Uniform Manifold Approximation  
1391 and Projection for Dimension Reduction. ArXiv e-prints. 2018.  
1392 doi:1802.03426v3

1393

## 1394 **Acknowledgments**

1395 We are grateful to the IMMGEN consortium for performing the RNA  
1396 sequencing of our samples and providing access to its database. We thank  
1397 the following core facilities at National Yang-Ming Chiao-Tung University:  
1398 Instrumentation Resource Center for providing access to its sorting and  
1399 imaging facility and the Animal Facility for mouse husbandry. We are very  
1400 grateful to Wan-Chun Chang, Bing-Xiu Guo, Chien-Yi Tung, and Kate Hua  
1401 from the Genomics Center for Clinical and Biotechnological Applications of  
1402 NCFB (NYCU, Taipei) for help with scRNA-Seq. Special thanks go to Dr.  
1403 Fang Liao, Academia Sinica, Taipei, for help with cell sorting and for providing  
1404 the 24G2 hybridoma, and Chang-Feng Chu for technical assistance. We are  
1405 very grateful to Ms. Su-Hua Jiang at Veterans General Hospital, Taipei, for  
1406 help with using the irradiator. Some figures were made with BioRender.

1407 This work was supported by the Ministry of Science and Technology  
1408 (grants # 106-2320-B-010 -026 -MY3, and 107-2320-B-010 -016 -MY3 to IL  
1409 Dzhagalov and grants # 107-2320-B-010-020, and 108-2628-B-010-005 to CL  
1410 Hsu), the Yen-Tjing Ling Medical Foundation (grants # CI-107-6 and CI-108-5  
1411 to IL Dzhagalov), and the Cancer Progression Research Center (NYCU). The  
1412 authors declare no competing financial interests.



1413 **Author contributions**

1414 TA Zhou designed experiments, performed research, analyzed and  
1415 interpreted data, and wrote the manuscript; HP Hsu and CY Lin performed  
1416 research, analyzed and interpreted data; YH Tu and HC Huang analyzed the  
1417 scRNA-Seq data; NJ Chen, JW Tsai, EA Robey, and CL Hsu provided  
1418 expertise, shared critical reagents, and edited the manuscript; IL Dzhagalov  
1419 conceptualized the studies, designed experiments, performed research,  
1420 analyzed, interpreted the data, and wrote the manuscript.

1421

1422

1423 **Supplementary figures and tables**

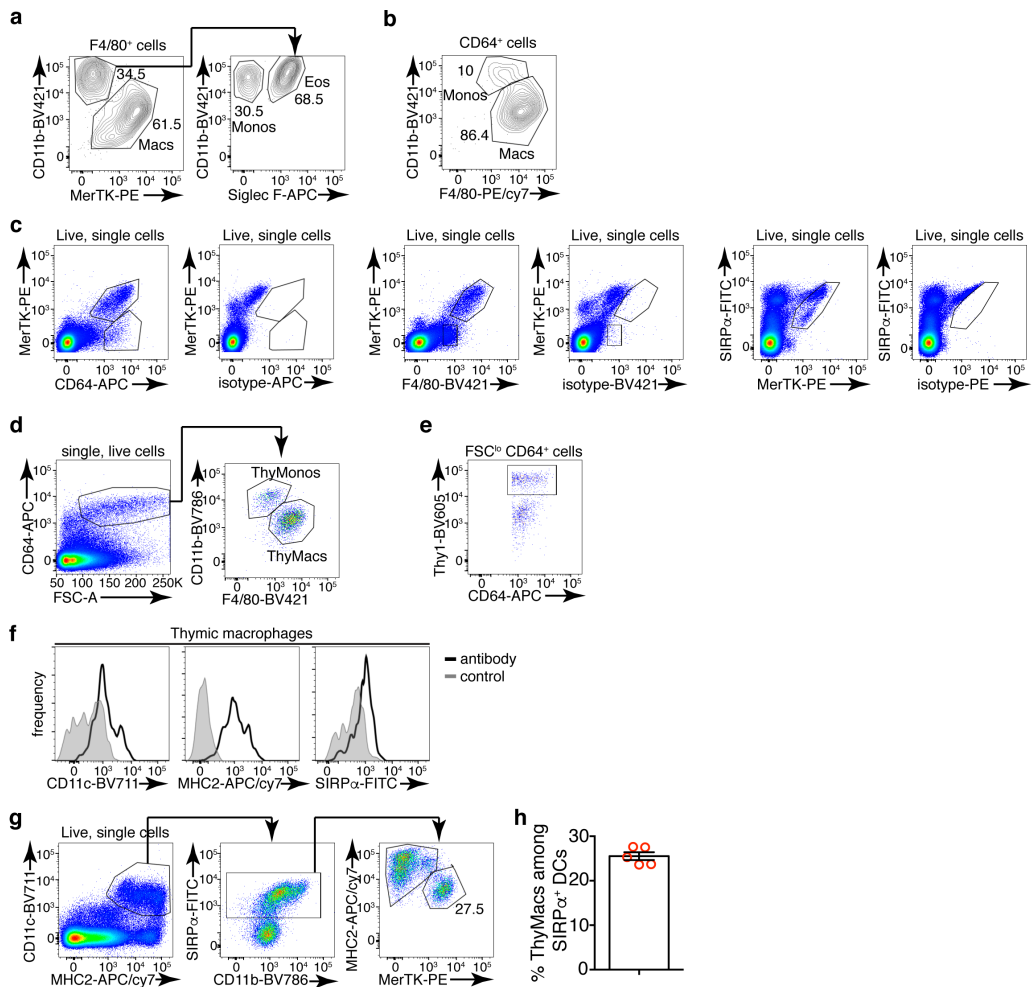

1424 **Figure 1 – Figure supplement 1: Phenotype of thymic macrophages**  
1425 **and other myeloid cells positive for F4/80 and CD64. a** Example flow  
1426 cytometry plots breaking down F4/80<sup>+</sup> cells in the thymus into macrophages  
1427 (MerTK<sup>+</sup>), eosinophils (CD11b<sup>+</sup>MerTK<sup>-</sup>Siglec F<sup>+</sup>) and monocytes  
1428 (CD11b<sup>+</sup>MerTK<sup>-</sup>Siglec F<sup>-</sup>). **b** An example flow cytometry plot dividing CD64<sup>+</sup>  
1429 cells into macrophages (F4/80<sup>+</sup>CD11b<sup>lo</sup>) and monocytes (CD11b<sup>+</sup>F4/80<sup>lo</sup>). **c**  
1430 Representative flow cytometry staining of enzymatically digested thymus  
1431 single-cell suspension for CD64, MerTK, and F4/80 and respective isotype  
1432 controls. **d** Gating strategy routinely used to identify thymic macrophages as  
1433 CD64<sup>+</sup>F4/80<sup>+</sup>CD11b<sup>lo</sup>FSC<sup>hi</sup> cells. **e** Example flow cytometry plots showing that  
1434 CD64<sup>+</sup>FSC<sup>lo</sup> cells include Thy1<sup>+</sup> cells (most likely thymocytes). **f** Expression of  
1435 CD11c, MHC2, and SIRP $\alpha$  on ThyMacs with respective controls. **g** Example  
1436 flow cytometry plots showing that gating on CD11c<sup>+</sup>MHC2<sup>+</sup> thymus cells, in  
1437 addition to DCs, also includes macrophages, especially among SIRP $\alpha$ <sup>+</sup> cells.  
1438 **h** Frequency of MerTK<sup>+</sup> cells among CD11c<sup>+</sup>MHC2<sup>+</sup>SIRP $\alpha$ <sup>+</sup> cells. The data  
1439 are mean $\pm$ SEM from 5 individual mice. Each dot is an individual mouse. The  
1440 flow cytometry plots are representative of  $\geq$ 5 individual experiments.

1441

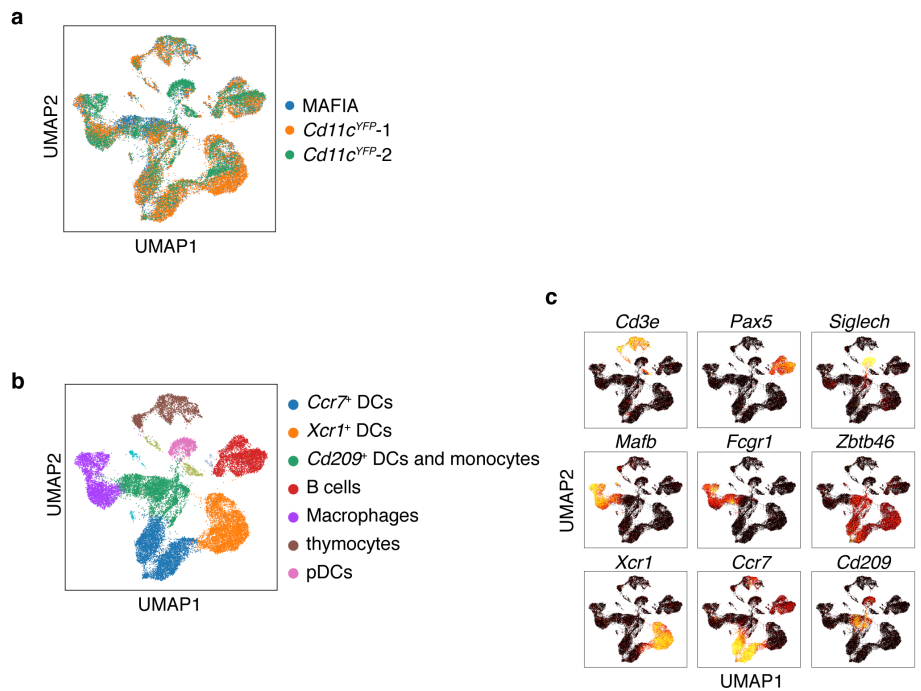

1442 **Figure 1 – Figure Supplement 2: UMAP clustering of single-cell RNA-**  
1443 **Sequencing (scRNA-Seq) data. a** Clustering of the scRNA-Seq data shows  
1444 that the cells from the three samples (one from GFP<sup>+</sup> cells in MAFIA mice and  
1445 two from YFP<sup>+</sup> cells in *Cd11c*<sup>YFP</sup> mice) overlap considerably. **b** Identification of  
1446 the clusters from the scRNA-Seq data based on lineage-specific markers. **c**  
1447 Expression of lineage-specific markers in different clusters.

1448

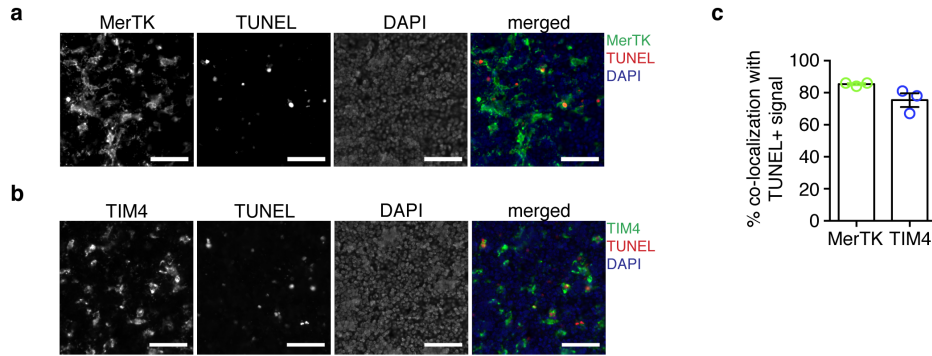

1449 **Figure 1 – Figure Supplement 3: Most TUNEL<sup>+</sup> apoptotic cells co-**  
 1450 **localize with thymic macrophages. a** Example images showing co-  
 1451 localization of TUNEL<sup>+</sup> apoptotic cells and MerTK<sup>+</sup> ThyMacs. **b** Example  
 1452 images showing co-localization of TUNEL<sup>+</sup> apoptotic cells and TIM4<sup>+</sup>  
 1453 ThyMacs. Scale bars in **a** and **b** are 50  $\mu$ m. **c** Frequencies of the co-  
 1454 localization of TUNEL<sup>+</sup> signal with MerTK<sup>+</sup> and TIM4<sup>+</sup> cells. All  
 1455 immunofluorescent images are representative of at least 3 independent  
 1456 repeats. Data in **c** represent mean $\pm$ SEM. Each dot is an individual mouse.

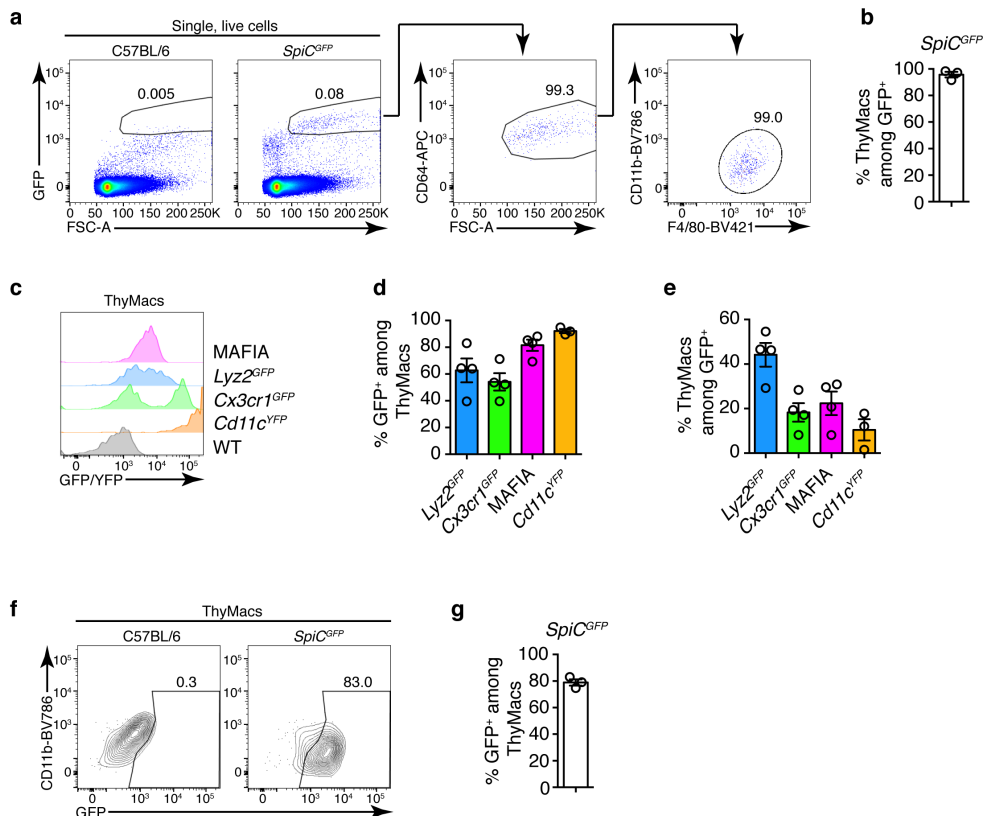

1457 **Figure 2 – Figure Supplement 1: Expression of *Spic*<sup>GFP</sup> marks most**  
 1458 **thymic macrophages. a** Example of the gating strategy to identify ThyMacs  
 1459 among *Spic*<sup>GFP+</sup> cells. **b** Frequencies of ThyMacs among *Spic*<sup>GFP+</sup> cells. **c**  
 1460 Representative flow cytometry plots of the expression of four reporter alleles  
 1461 in ThyMacs. **d** Frequencies of GFP/YFP<sup>+</sup> cells among ThyMacs. **e**  
 1462 Frequencies of ThyMacs among GFP/YFP<sup>+</sup> cells. **f** Representative flow  
 1463 cytometry plots of the expression of *Spic*<sup>GFP</sup> in ThyMacs. **g** Frequencies of  
 1464 *Spic*<sup>GFP+</sup> cells among ThyMacs. All flow cytometry plots are representative of  
 1465 at least 3 independent repeats. Data in **b**, **d**, **e**, and **f** represent mean±SEM.  
 1466 Each dot is an individual mouse. The numbers in the flow cytometry plots are  
 1467 the percent of cells in the respective gate.  
 1468

Table S1: Expression of differentially up-regulated transcription factors in thymic macrophages

| Gene name      | ThyMacs | non-ThyMacs |
|----------------|---------|-------------|
| <i>Irf7</i>    | 3879.32 | 300.82      |
| <i>Irf8</i>    | 3528.27 | 1474.35     |
| <i>Stat1</i>   | 2403.69 | 522.04      |
| <i>Dnmt3a</i>  | 1515.94 | 647.81      |
| <i>Znxf1</i>   | 1379.89 | 635.36      |
| <i>Stat2</i>   | 1210.35 | 472.53      |
| <i>Nr1h3</i>   | 1182.17 | 147.05      |
| <i>Srebf1</i>  | 975.09  | 399.06      |
| <i>Rxra</i>    | 760.26  | 298.55      |
| <i>Trps1</i>   | 746.36  | 232.48      |
| <i>Runx3</i>   | 723.14  | 9.76        |
| <i>Relb</i>    | 715.53  | 293.92      |
| <i>Sp100</i>   | 696.94  | 324.47      |
| <i>Zbp1</i>    | 639.19  | 69.83       |
| <i>Tfec</i>    | 588.72  | 74.66       |
| <i>Spic</i>    | 573.11  | 34.36       |
| <i>Nfkbie</i>  | 569.74  | 226.76      |
| <i>Ncoa4</i>   | 550.69  | 249.15      |
| <i>Rest</i>    | 548.22  | 269.22      |
| <i>Meis3</i>   | 530.8   | 120.91      |
| <i>Bhlhe40</i> | 490.59  | 99.56       |
| <i>Parp12</i>  | 414.11  | 126.82      |
| <i>Arid5b</i>  | 374.03  | 177.08      |
| <i>Creb5</i>   | 295.14  | 47.91       |
| <i>Pparg</i>   | 276.54  | 33.24       |

1469 **Figure 2 – Table Supplement 1: Expression of differentially up-**  
 1470 **regulated transcription factors in thymic macrophages.** Transcription  
 1471 factors that were highly expressed in thymic macrophages (>250) and up-

1472 regulated >2-fold in thymic macrophages compared to non-thymic  
 1473 macrophages were listed alphabetically, and the geometric mean of 4  
 1474 replicates of thymic macrophages (ThyMacs) and two replicates of each of the  
 1475 9 non-thymic macrophage populations (non-ThyMacs) were recorded. Non-  
 1476 thymic macrophages are: spleen red pulp macrophages, Kupffer cells,  
 1477 bronchoalveolar lavage macrophages, peritoneal cavity macrophages, aorta  
 1478 macrophages, heart macrophages, white adipose tissue macrophages,  
 1479 central nervous system microglia, spinal cord macrophages.

**Table S2. List of the differentially expressed genes among *Timd4*+ thymic macrophages, *Cx3cr1*+ thymic macrophages, and thymic monocytes**

| <b>CX3CR1+ ThyMacs</b> |                  | <b>Tim4+ ThyMacs</b> |                  | <b>ThyMonos</b> |                  |
|------------------------|------------------|----------------------|------------------|-----------------|------------------|
| Gene name              | adjusted p-value | Gene name            | adjusted p-value | Gene name       | adjusted p-value |
| <i>Ctsz</i>            | 0                | <i>Hpgd</i>          | 0                | <i>Alox5ap</i>  | 0                |
| <i>Cd63</i>            | 0                | <i>Serpnb6a</i>      | 0                | <i>S100a6</i>   | 0                |
| <i>Pmepa1</i>          | 0                | <i>Slc40a1</i>       | 0                | <i>Ly6c2</i>    | 0                |
| <i>Zmynd15</i>         | 0                | <i>Cd81</i>          | 0                | <i>Ifi27l2a</i> | 0                |
| <i>Olfml3</i>          | 0                | <i>Vcam1</i>         | 0                | <i>Fau</i>      | 0                |
| <i>Mmp2</i>            | 0                | <i>Cfp</i>           | 0                | <i>Coro1a</i>   | 0                |
| <i>AU020206</i>        | 1.60E-290        | <i>Spic</i>          | 0                | <i>Ccr2</i>     | 0                |
| <i>Plxnd1</i>          | 1.59E-285        | <i>Trf</i>           | 0                | <i>Rps27</i>    | 0                |
| <i>Cst7</i>            | 8.68E-279        | <i>Actn1</i>         | 0                | <i>Tmsb10</i>   | 0                |
| <i>Dnase1l3</i>        | 2.45E-270        | <i>Maf</i>           | 0                | <i>Ifitm2</i>   | 7.21E-302        |
| <i>Timp2</i>           | 2.15E-267        | <i>Pld3</i>          | 0                | <i>Fxyd5</i>    | 6.36E-299        |
| <i>Lgals3bp</i>        | 8.69E-263        | <i>Il18</i>          | 0                | <i>Rps19</i>    | 2.04E-292        |
| <i>Pdgfa</i>           | 6.87E-255        | <i>Mrc1</i>          | 0                | <i>Rpl18</i>    | 6.50E-291        |
| <i>Mmp14</i>           | 2.33E-253        | <i>Crip2</i>         | 0                | <i>Rpl9</i>     | 1.11E-289        |
| <i>Fam46c</i>          | 9.99E-235        | <i>Tmem65</i>        | 0                | <i>Rps23</i>    | 1.28E-289        |
| <i>Chst2</i>           | 1.19E-226        | <i>Igf1</i>          | 0                | <i>Napsa</i>    | 8.91E-279        |
| <i>Cp</i>              | 5.36E-225        | <i>Epb41l3</i>       | 0                | <i>Ms4a4c</i>   | 8.25E-272        |
| <i>Camk1</i>           | 7.12E-225        | <i>Timd4</i>         | 0                | <i>Plac8</i>    | 2.10E-270        |
| <i>B2m</i>             | 1.09E-222        | <i>Blvrb</i>         | 0                | <i>Rpl18a</i>   | 9.26E-269        |
| <i>Lhfpl2</i>          | 4.52E-217        | <i>Clec1b</i>        | 0                | <i>S100a4</i>   | 4.98E-268        |
| <i>Acp5</i>            | 5.90E-216        | <i>Cd68</i>          | 0                | <i>Cd52</i>     | 3.67E-267        |
| <i>Lag3</i>            | 3.91E-213        | <i>Axl</i>           | 0                | <i>Rps14</i>    | 1.94E-266        |
| <i>Lyz2</i>            | 1.28E-209        | <i>Paqr9</i>         | 3.32E-307        | <i>Ifitm3</i>   | 3.19E-263        |
| <i>H2-M2</i>           | 1.22E-199        | <i>Sdc3</i>          | 3.45E-305        | <i>Rpl34</i>    | 2.02E-261        |
| <i>Psap</i>            | 7.26E-198        | <i>Myo9a</i>         | 5.59E-305        | <i>Rps27a</i>   | 3.67E-260        |
| <i>Gatm</i>            | 1.33E-192        | <i>Scp2</i>          | 3.79E-302        | <i>Rpl36</i>    | 1.54E-259        |
| <i>Cpd</i>             | 1.50E-192        | <i>Selenop</i>       | 2.10E-295        | <i>Rps16</i>    | 2.55E-258        |

|                 |           |                 |           |                 |           |
|-----------------|-----------|-----------------|-----------|-----------------|-----------|
| <i>C3</i>       | 2.34E-187 | <i>Lrp1</i>     | 2.08E-294 | <i>Rpl24</i>    | 1.37E-257 |
| <i>Cxcl16</i>   | 8.11E-183 | <i>Lap3</i>     | 1.45E-290 | <i>Rps9</i>     | 6.34E-253 |
| <i>Lgals3</i>   | 1.57E-182 | <i>Marcks</i>   | 2.77E-279 | <i>Gpr141</i>   | 1.21E-246 |
| <i>Ube2j1</i>   | 1.63E-180 | <i>Glul</i>     | 3.64E-279 | <i>Rpl27a</i>   | 3.06E-243 |
| <i>Plxnc1</i>   | 9.84E-180 | <i>Hebp1</i>    | 3.76E-278 | <i>Rpl17</i>    | 8.15E-241 |
| <i>Stab1</i>    | 4.07E-176 | <i>Ear2</i>     | 4.53E-276 | <i>Rps24</i>    | 1.46E-240 |
| <i>Cyth1</i>    | 3.27E-163 | <i>Apoc1</i>    | 2.49E-275 | <i>Rps13</i>    | 2.34E-236 |
| <i>Spsb1</i>    | 3.96E-163 | <i>Kcna2</i>    | 3.72E-275 | <i>Rpl38</i>    | 1.95E-226 |
| <i>Blnk</i>     | 2.35E-162 | <i>Myo10</i>    | 9.05E-269 | <i>H2-DMb1</i>  | 1.02E-223 |
| <i>Cx3cr1</i>   | 9.29E-162 | <i>Atp13a2</i>  | 2.95E-267 | <i>Rps18</i>    | 5.39E-223 |
| <i>Med10</i>    | 5.25E-161 | <i>Slc1a3</i>   | 6.24E-263 | <i>Rpl19</i>    | 3.68E-221 |
| <i>Nek6</i>     | 5.28E-160 | <i>Slco2b1</i>  | 1.11E-258 | <i>Rpl8</i>     | 2.01E-219 |
| <i>Ptms</i>     | 1.05E-159 | <i>mt-Nd2</i>   | 3.45E-258 | <i>Rpl7a</i>    | 4.17E-217 |
| <i>Anxa5</i>    | 1.10E-156 | <i>Wwp1</i>     | 2.16E-253 | <i>Gm34084</i>  | 5.23E-216 |
| <i>GpnmB</i>    | 1.21E-154 | <i>Appl2</i>    | 4.22E-248 | <i>Rpl13</i>    | 2.08E-215 |
| <i>Itgb5</i>    | 2.78E-154 | <i>Atp8a1</i>   | 5.03E-248 | <i>Rpl11</i>    | 2.47E-213 |
| <i>Myo5a</i>    | 1.11E-146 | <i>P2ry13</i>   | 3.17E-247 | <i>Rpl35a</i>   | 2.13E-210 |
| <i>Runx3</i>    | 1.81E-146 | <i>Ccdc148</i>  | 4.70E-245 | <i>Rpsa</i>     | 1.62E-209 |
| <i>Tmem176a</i> | 2.34E-144 | <i>Gn</i>       | 1.58E-244 | <i>Rpl6</i>     | 5.70E-208 |
| <i>Ctss</i>     | 4.81E-141 | <i>Bank1</i>    | 1.82E-239 | <i>Tpt1</i>     | 2.63E-206 |
| <i>Sh3pxd2b</i> | 9.38E-141 | <i>Mertk</i>    | 2.15E-238 | <i>Rack1</i>    | 2.14E-203 |
| <i>Rtcb</i>     | 4.42E-140 | <i>Nr1h3</i>    | 1.13E-235 | <i>Rpl23</i>    | 6.14E-199 |
| <i>Fam20c</i>   | 1.91E-139 | <i>Prnp</i>     | 2.93E-235 | <i>Rpl26</i>    | 7.48E-198 |
| <i>Il2rg</i>    | 8.84E-138 | <i>Ninj1</i>    | 2.42E-234 | <i>Rps6</i>     | 6.64E-197 |
| <i>Lpcat2</i>   | 8.53E-137 | <i>Fcna</i>     | 3.33E-233 | <i>Rps10</i>    | 2.06E-195 |
| <i>Kynu</i>     | 8.49E-136 | <i>Csrp1</i>    | 1.16E-230 | <i>Ier5</i>     | 1.06E-191 |
| <i>Tnfsf13b</i> | 8.77E-136 | <i>Rgl1</i>     | 7.18E-229 | <i>Rps3</i>     | 8.23E-185 |
| <i>Gpr157</i>   | 1.18E-135 | <i>Lpl</i>      | 4.94E-223 | <i>Rpl27</i>    | 8.23E-185 |
| <i>Tgfb1</i>    | 7.63E-135 | <i>Fam213b</i>  | 1.08E-222 | <i>Rps5</i>     | 8.36E-185 |
| <i>H2-K1</i>    | 1.15E-133 | <i>Tcf7l2</i>   | 1.26E-222 | <i>Rps7</i>     | 3.96E-182 |
| <i>Basp1</i>    | 1.23E-133 | <i>AB124611</i> | 4.64E-221 | <i>Rps15a</i>   | 6.82E-182 |
| <i>Pla2g7</i>   | 1.80E-132 | <i>Abcc3</i>    | 3.28E-216 | <i>Rps11</i>    | 1.97E-180 |
| <i>Fth1</i>     | 4.19E-131 | <i>Fcgrt</i>    | 5.79E-216 | <i>Rps4x</i>    | 5.07E-180 |
| <i>Ggh</i>      | 1.85E-126 | <i>Tgm2</i>     | 1.88E-215 | <i>Rplp0</i>    | 3.09E-177 |
| <i>Adam19</i>   | 6.94E-126 | <i>Itgad</i>    | 5.35E-214 | <i>Ly6i</i>     | 8.17E-176 |
| <i>C3ar1</i>    | 7.35E-125 | <i>Ptgs1</i>    | 2.94E-213 | <i>S100a11</i>  | 6.23E-175 |
| <i>Ccl12</i>    | 3.37E-123 | <i>Laptm4a</i>  | 1.01E-212 | <i>Atox1</i>    | 1.22E-174 |
| <i>Hvcn1</i>    | 2.51E-121 | <i>Comt</i>     | 1.33E-206 | <i>Pim1</i>     | 9.56E-174 |
| <i>Anxa3</i>    | 8.60E-121 | <i>Creg1</i>    | 3.24E-205 | <i>Sh3bgrl3</i> | 3.97E-173 |
| <i>Tgfb1</i>    | 1.88E-120 | <i>Adgre1</i>   | 9.67E-205 | <i>Ciita</i>    | 7.35E-173 |
| <i>Ctsd</i>     | 2.73E-117 | <i>Clec12a</i>  | 6.33E-204 | <i>Eef1a1</i>   | 6.09E-172 |
| <i>Itm2c</i>    | 5.19E-116 | <i>Tspan4</i>   | 7.80E-203 | <i>Rps3a1</i>   | 9.09E-168 |
| <i>Tmem119</i>  | 5.62E-116 | <i>Txn1</i>     | 9.13E-203 | <i>Gm2a</i>     | 6.07E-165 |
| <i>Rap2a</i>    | 1.03E-114 | <i>Ctsb</i>     | 9.52E-201 | <i>Ptprc</i>    | 2.05E-163 |
| <i>Ctsl</i>     | 4.00E-114 | <i>Mrap</i>     | 5.65E-197 | <i>Rpl37</i>    | 1.51E-161 |
| <i>Itga6</i>    | 1.83E-113 | <i>Slc16a9</i>  | 5.99E-197 | <i>Rps25</i>    | 3.03E-160 |



|                 |           |                |           |                |           |
|-----------------|-----------|----------------|-----------|----------------|-----------|
| <i>B4galnt1</i> | 2.45E-113 | <i>Abcg3</i>   | 3.83E-196 | <i>H3f3a</i>   | 5.92E-159 |
| <i>Fam3c</i>    | 1.64E-112 | <i>Pla2g15</i> | 4.22E-196 | <i>Btg2</i>    | 1.14E-158 |
| <i>Tmem173</i>  | 1.54E-111 | <i>C1qc</i>    | 6.17E-192 | <i>Rpl15</i>   | 1.42E-158 |
| <i>Ski</i>      | 3.59E-111 | <i>Agpat3</i>  | 1.68E-191 | <i>Cnn2</i>    | 1.09E-156 |
| <i>Anpep</i>    | 5.85E-111 | <i>Hs6st1</i>  | 1.95E-191 | <i>Cdkn1a</i>  | 2.57E-156 |
| <i>Gng2</i>     | 2.37E-110 | <i>Dmpk</i>    | 2.15E-191 | <i>Sfn1</i>    | 4.83E-155 |
| <i>Nceh1</i>    | 2.88E-110 | <i>Cd38</i>    | 1.79E-190 | <i>Sem1</i>    | 4.08E-154 |
| <i>H2-Q7</i>    | 4.94E-108 | <i>Tmem26</i>  | 2.02E-189 | <i>Lsp1</i>    | 1.34E-152 |
| <i>Rtn1</i>     | 1.28E-106 | <i>Slc11a1</i> | 1.05E-188 | <i>Rpl37a</i>  | 1.78E-152 |
| <i>Sorl1</i>    | 1.31E-103 | <i>Cd300a</i>  | 1.41E-187 | <i>Rpl22</i>   | 3.64E-152 |
| <i>Glpr1</i>    | 1.22E-102 | <i>Slc7a7</i>  | 3.28E-187 | <i>Sirpb1c</i> | 4.81E-152 |
| <i>Gsn</i>      | 2.00E-102 | <i>Cyb5a</i>   | 6.94E-187 | <i>Traf1</i>   | 6.97E-152 |
| <i>Afdn</i>     | 4.54E-102 | <i>Sipa111</i> | 7.41E-187 | <i>Emb</i>     | 4.22E-151 |
| <i>Ak2</i>      | 1.11E-101 | <i>Il18bp</i>  | 1.48E-186 | <i>Rpl30</i>   | 1.32E-147 |
| <i>Ntocr</i>    | 2.21E-98  | <i>Cd86</i>    | 2.52E-183 | <i>Rps15</i>   | 1.14E-146 |
| <i>Scarb2</i>   | 3.16E-97  | <i>Vamp5</i>   | 3.05E-183 | <i>H2-Ab1</i>  | 2.84E-145 |
| <i>Creb5</i>    | 5.41E-97  | <i>Jup</i>     | 6.69E-182 | <i>Il1b</i>    | 3.05E-145 |
| <i>Gsto1</i>    | 5.56E-97  | <i>Blvra</i>   | 1.30E-178 | <i>Rps28</i>   | 4.52E-145 |
| <i>Ncf1</i>     | 4.26E-96  | <i>Mgst1</i>   | 6.48E-178 | <i>Jarid2</i>  | 1.82E-143 |
| <i>Ppfia4</i>   | 4.97E-96  | <i>Tbxas1</i>  | 1.47E-177 | <i>Rps26</i>   | 1.53E-142 |
| <i>Chchd10</i>  | 7.77E-96  | <i>Hpgds</i>   | 2.04E-177 | <i>Rpl32</i>   | 4.21E-142 |
| <i>Gna12</i>    | 1.23E-95  | <i>Tgfbr2</i>  | 2.70E-176 | <i>Pld4</i>    | 9.07E-142 |
| <i>Mvb12b</i>   | 1.80E-95  | <i>Clec4n</i>  | 3.52E-175 | <i>Cbfa2t3</i> | 1.54E-141 |
| <i>Rasal3</i>   | 1.45E-94  | <i>Ms4a7</i>   | 5.30E-175 | <i>Rps21</i>   | 4.04E-141 |
| <i>Scoc</i>     | 6.86E-94  | <i>Sirpa</i>   | 3.35E-171 | <i>Fgr</i>     | 4.04E-141 |
| <i>Cfb</i>      | 6.00E-93  | <i>Fyn</i>     | 2.84E-168 | <i>Rps8</i>    | 1.11E-139 |
| <i>Lmna</i>     | 1.04E-92  | <i>Cadm1</i>   | 2.20E-167 | <i>Cd74</i>    | 5.34E-138 |

1480

1481 **Figure 5 – Table Supplement 1: List of the differentially expressed**

1482 **genes among *Timd4*<sup>+</sup> thymic macrophages, *Cx3cr1*<sup>+</sup> thymic**

1483 **macrophages, and thymic monocytes.** The top 100 differentially expressed

1484 genes among the three clusters are listed by their negative log<sub>10</sub> transformed

1485 p-value.

1486

1487
